# Supplementary material
Source: publisher figshare collection journal article supplement (https://acs.figshare.com/ndownloader/files/22494653)
Supplement: Supplementary file 1 [file 22494653]

## Supporting Information

### **Flexible Luminescent MOF: Trapping of Less Stable Conformation of Rotational Isomers, In Situ Guest Responsive Turn-Off and Turn-On Luminescence and Mechanistic Study**

Sajal Khatua\*<sup>a</sup> and Protap Biswas<sup>a</sup>.

<sup>a</sup> School of Chemical Sciences, Indian Association for the Cultivation of Science, 2A & 2B Raja S. C. Mullick Road, Kolkata-700032, West Bengal., India.

Email: [ocsk2@iacs.res.in](mailto:ocsk2@iacs.res.in)

#### **Experimental Section:**

**Selectivity Test for Encapsulation of Volatile Organic Solvents:** The orange crystals (120 mg) of the parent MOF (**1**) in 5 mL small open vial were placed in to 20ml capped vials containing a mixture of CHCl<sub>3</sub>, CH<sub>2</sub>Cl<sub>2</sub> and CCl<sub>4</sub> with a volume ratio 1:1:1 for vapor diffusion for 7 days. Solvent-exchanged crystals suitable for X-ray diffraction were obtained.

**Reversibility Test for volatile Organic Solvent Encapsulation:** When activated sample (**1'**) was exposed for vapour (CHCl<sub>3</sub>, CH<sub>2</sub>Cl<sub>2</sub> and CCl<sub>4</sub>) diffusion for 7 days at RT, the volatile organic solvents were incorporated in the void space to yield **1n'**, **1o'** and **1p'** which are identical to **1n**, **1o** and **1p**, respectively (Scheme S1). The appearance of the characteristic FTIR peaks for respective volatile organic solvents in 1D channel of **1n'**, **1o'** and **1p'** confirmed that those peaks were also present in **1n**, **1o** and **1p**, respectively (**1n'**, **1o'** and **1p'** identical to **1n**, **1o** and **1p**, respectively) (Figure S12 (b-d)). The RT PXRD patterns of **1n'**, **1o'** and **1p'** suggested that the basic framework architecture of **1** was retained after incorporation of volatile organic solvent molecules (Figure S12 (e)). The empty framework architecture of **1'** can be regenerated by simple heating the solvent exchanged complexes (**1n'**, **1o'** and **1p'**) at 160 °C for 24 h (Scheme S1) which confirmed its reversibility.

**Selectivity Test for Encapsulation of Rotational Isomers:** The insoluble crystals of **1** in small (5ml) open glass vial were kept into capped glass vial (20 mL) containing a mixture of DCE, DBE and ethylene glycol with a volume ratio 1:1:1 for 7 days.

**Reversibility Test for Encapsulation of Rotational Isomers:** The same method as for the reversible encapsulation of volatile organic solvents was followed but here, **1'** was exposed for vapor diffusion in different rotational vapors (DCE, DBE and ethylene glycol) for 7 days at room temperature. The rotational isomer included complexes (**1q'**, **1r'**, and **1s'**) were confirmed by characteristic FT-IR peaks as found in **1q**, **1r** and **1s**, respectively (Scheme S2 and Figure S18 (a-c)). The PXRD patterns of **1q'**, **1r'** and **1s'** suggested that

the basic framework pattern of **1** was remained the same after incorporation of rotational isomers but some peaks appear at lower angles (Figure S18 (d)). This might be due to mechanical sliding of the interpenetrated 2D sheet structures of **1**. By heating of **1q'**, **1r'** and **1s'** at 160 °C for 24 h, **1'** can be regenerated (Scheme S2) which confirmed its reversible inclusion of rotational isomers by Cu(I)MOF.

**Selectivity Test for Encapsulation of benzene and its derivatives and naphthalene:** The same method as for the selective test for volatile organic solvents was followed but here MeCN solution of naphthalene was mixed with a mixture of benzene and its derivatives in a volume ratio of 1:1:1:1:1 and **1** was kept for vapor diffusion in this vapour mixture for 7 days at rt.

**Reversibility Test for Encapsulation of benzene and its derivatives and naphthalene:** The same procedure as for reversible encapsulation of volatile organic solvents was followed but **1'** was kept for vapor diffusion of benzene and its derivatives and naphthalene (naphthalene in MeCN solution) separately for a period of 7 days at RT. The benzene and its derivatives and naphthalene included complexes (**1t'**, **1u'**, **1v'**, **1w'**, **1x'** and **1y'**) were confirmed by characteristic FT-IR peaks as found in **1t**, **1u**, **1v**, **1w**, **1x** and **1y**, respectively (Figure S28 (a-f)). PXRD patterns of **1t'**, **1u'**, **1v'**, **1w'**, **1x'** and **1y'** indicated that the basic framework architecture of **1** was remained the same but, some peaks appear at lower angle (Figure S28(g-h)). This can be attributed to mechanical sliding of the interpenetrated 2D sheet structures of **1**. By heating of **1t'**, **1u'**, **1v'**, **1w'**, **1x'** and **1y'** at 160 °C for 24 h, **1'** can be regenerated (Scheme S4) which confirmed its reversible inclusion of benzene and its derivatives and naphthalene by Cu(I)MOF.

**Isolation of intermediate of each guest encapsulation:** Orange crystals of **1** were exposed to vapors of CHCl<sub>3</sub>, CH<sub>2</sub>Cl<sub>2</sub>, CCl<sub>4</sub>, DCE, DBE, ethylene glycol, PhH, PhCH<sub>3</sub>, *o*-PhCl<sub>2</sub>, PhNH<sub>2</sub>, PhCH<sub>2</sub>NH<sub>2</sub> and naphthalene (in MeCN soln.) for a weak at room temperature. To investigate mechanism behind inclusion process, we stopped the reaction after three days for each guest inclusion process and isolated the intermediate of each guest inclusion. The intermediate was appeared as black material and suitable for SXRD analysis.

**Hot stage microscopic image experiment:** In one set of experiment, one single crystal of **1** was heated from 25 to 200 °C and per 10°C rise in temperature we collected the change in color of **1**. In another set of experiment, at transient temperature where orange color crystal turned into black crystal, was collected for SCXRD analysis.

**Photoluminescence (PL) Study of all guest exchanged complexes in Solid Phase:** Orange crystal of **1** (120 mg each) were exposed to vapor of different volatile organic solvents ( $\text{CHCl}_3$ ,  $\text{CH}_2\text{Cl}_2$  and  $\text{CCl}_4$ ), rotational isomers (DCE, DBE and ethylene glycol), benzene and its derivatives and naphthalene (MeCN soln.) for 7 days. PL data of the guest included compounds were recorded at room temperature upon excitation at 418 nm.

**PL Study of the benzene and its derivatives in Solution Phase:** 1.0 mM saturated solution of each analyte was prepared in 10 mL dry MeCN. 1 mg of **1** was added to 3 mL of dry MeCN under stirring. The fluorescence was measured in-situ in the range of 300-535 nm upon addition of freshly prepared analyte solutions ( $\lambda_{\text{ex}} = 268 \text{ nm}$ ). Solutions were stirred at constant rate during experiment to make a homogenous solution. All the experiments were performed in triplicate and consistent results are obtained in all cases.

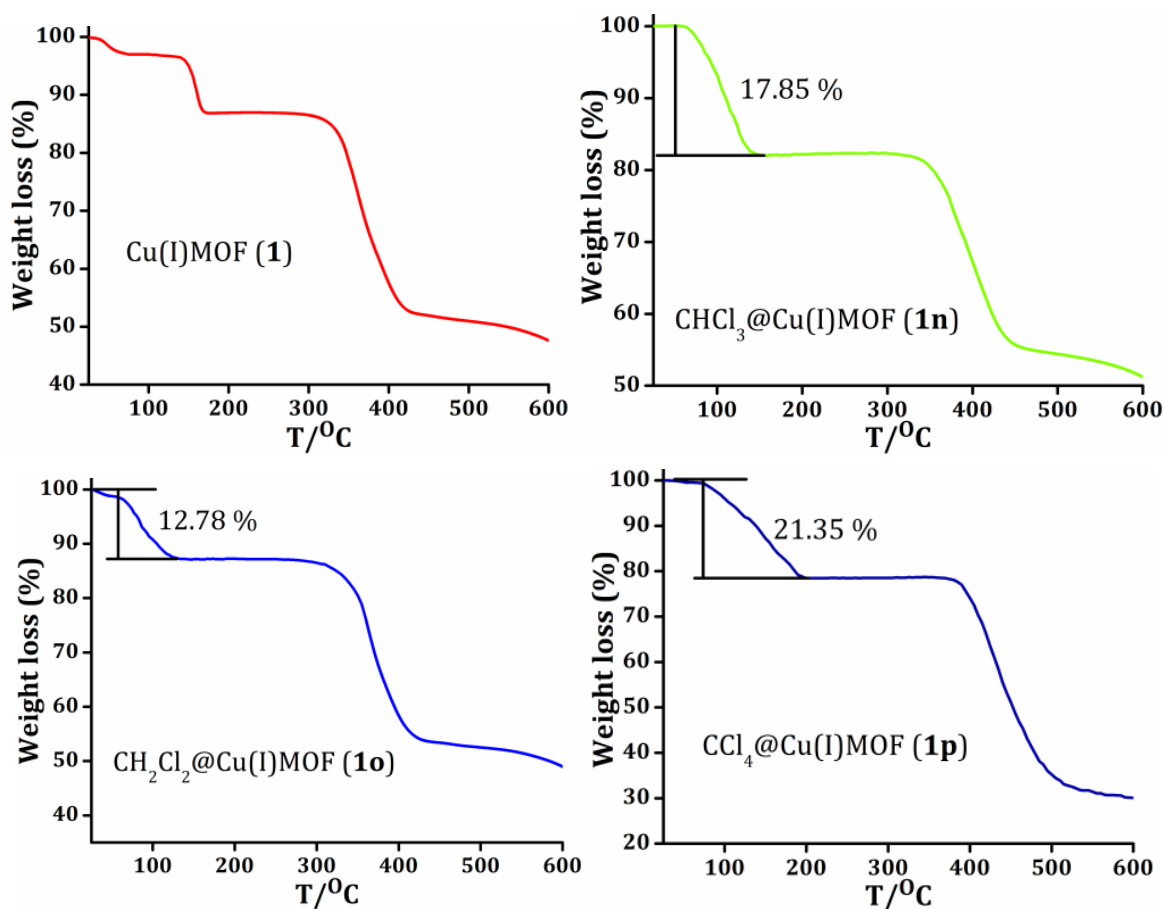

**Figure S1.** TGA plots of **1** and all the volatile organic solvent included complexes.

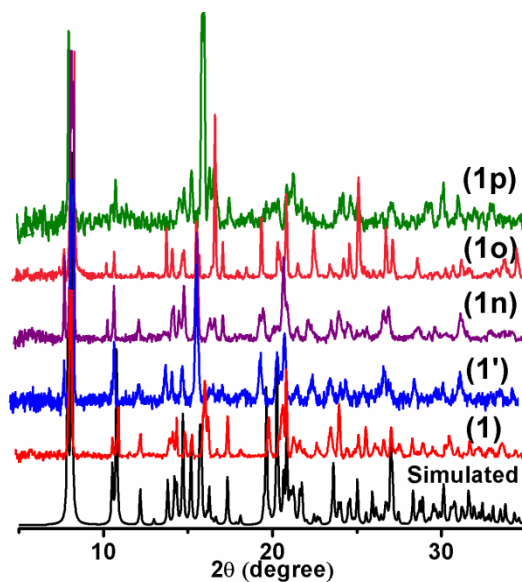

**Figure S2.** PXRD patterns of the simulated, as-synthesized (**1**), activated (**1'**) and different volatile organic solvent included complexes.

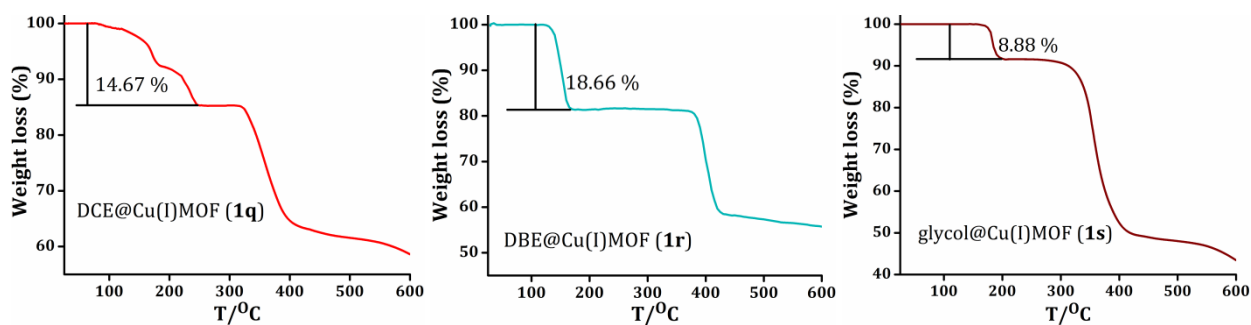

**Figure S3.** TGA plots of all the rotational isomer included complexes.

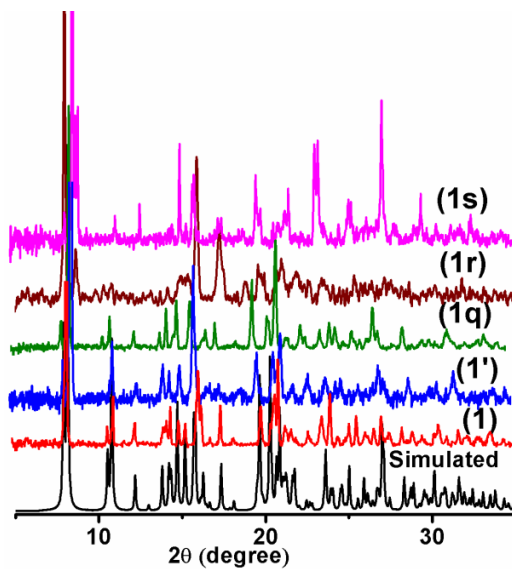

**Figure S4.** PXRD patterns of the simulated, as-synthesized (**1**), activated (**1'**) and different rotational isomers included complexes.

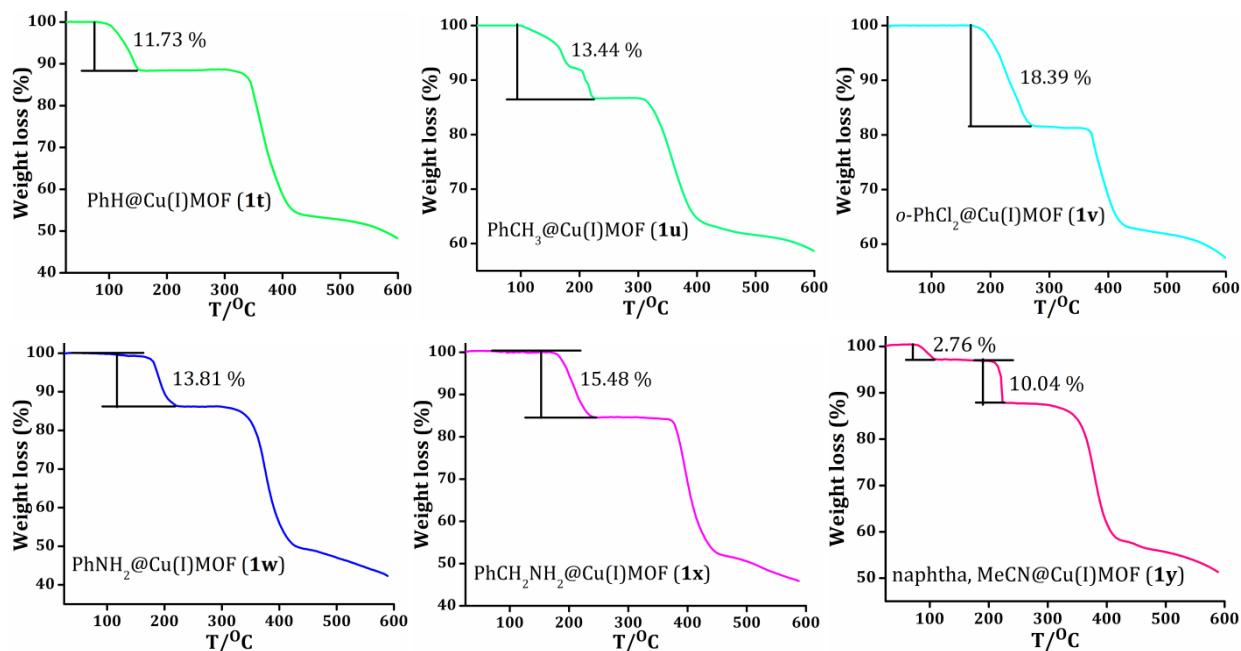

**Figure S5.** TGA plots of all benzene and its derivatives, and naphthalene included complexes.

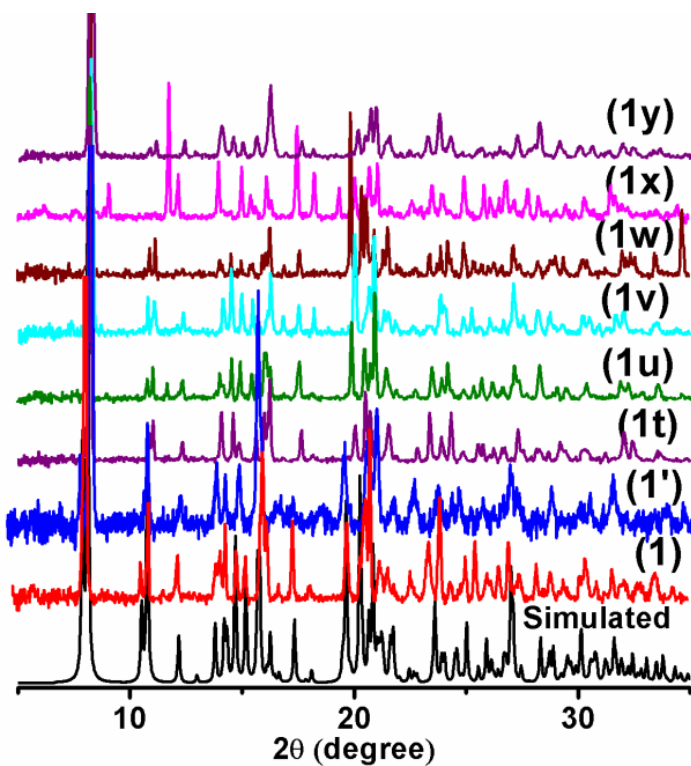

**Figure S6.** PXRD patterns of the simulated, as-synthesized (1), activated (1'), benzene and its derivatives and naphthalene included complexes.

**Table S1.** Crystal and structure refinement data for guest included Cu(I)MOF.

| Identification code                                          | <b>1n</b>                                                                                                    | <b>1o</b>                                                                    | <b>1p</b>                                                                    | <b>1q</b>                                                                                                    |
|--------------------------------------------------------------|--------------------------------------------------------------------------------------------------------------|------------------------------------------------------------------------------|------------------------------------------------------------------------------|--------------------------------------------------------------------------------------------------------------|
| CCDC No                                                      | <b>1918497</b>                                                                                               | <b>1918499</b>                                                               | <b>1918500</b>                                                               | <b>1918498</b>                                                                                               |
| Empirical formula                                            | C <sub>46</sub> H <sub>36</sub> Cl <sub>6</sub> Cu <sub>2</sub> I <sub>2</sub> N <sub>6</sub> O <sub>2</sub> | C <sub>23</sub> H <sub>19</sub> Cl <sub>2</sub> CuIN <sub>3</sub> O          | C <sub>23</sub> H <sub>15.95</sub> Cl <sub>4</sub> CuIN <sub>3</sub> O       | C <sub>48</sub> H <sub>42</sub> Cl <sub>4</sub> Cu <sub>2</sub> I <sub>2</sub> N <sub>6</sub> O <sub>2</sub> |
| Formula weight                                               | 1298.39                                                                                                      | 614.75                                                                       | 682.57                                                                       | 1257.55                                                                                                      |
| Temperature/K                                                | 100                                                                                                          | 100                                                                          | 100                                                                          | 100                                                                                                          |
| Crystal system                                               | triclinic                                                                                                    | monoclinic                                                                   | monoclinic                                                                   | monoclinic                                                                                                   |
| Space group                                                  | <i>P</i> -1                                                                                                  | <i>C</i> 2/ <i>c</i>                                                         | <i>C</i> 2/ <i>c</i>                                                         | <i>C</i> 2/ <i>c</i>                                                                                         |
| <i>a</i> /Å                                                  | 12.166(4)                                                                                                    | 24.6615(9)                                                                   | 24.282(3)                                                                    | 25.122(3)                                                                                                    |
| <i>b</i> /Å                                                  | 13.376(5)                                                                                                    | 12.0846(5)                                                                   | 12.4370(14)                                                                  | 11.9422(11)                                                                                                  |
| <i>c</i> /Å                                                  | 18.035(5)                                                                                                    | 18.0322(7)                                                                   | 17.961(2)                                                                    | 17.937(2)                                                                                                    |
| $\alpha$ /°                                                  | 68.76(2)                                                                                                     | 90                                                                           | 90                                                                           | 90                                                                                                           |
| $\beta$ /°                                                   | 74.17(2)                                                                                                     | 113.580(2)                                                                   | 112.100(4)                                                                   | 113.817(5)                                                                                                   |
| $\gamma$ /°                                                  | 66.27(2)                                                                                                     | 90                                                                           | 90                                                                           | 90                                                                                                           |
| Volume/Å <sup>3</sup>                                        | 2476.5(15)                                                                                                   | 4925.3(3)                                                                    | 5025.5(10)                                                                   | 4922.9(9)                                                                                                    |
| <i>Z</i>                                                     | 2                                                                                                            | 8                                                                            | 8                                                                            | 4                                                                                                            |
| $\rho_{\text{calc}}$ /g/cm <sup>3</sup>                      | 1.741                                                                                                        | 1.658                                                                        | 1.804                                                                        | 1.697                                                                                                        |
| $\mu$ /mm <sup>-1</sup>                                      | 2.473                                                                                                        | 2.377                                                                        | 2.545                                                                        | 2.38                                                                                                         |
| <i>F</i> (000)                                               | 1272                                                                                                         | 2416                                                                         | 2664                                                                         | 2480                                                                                                         |
| Crystal size/mm <sup>3</sup>                                 | 0.36 × 0.35 × 0.34                                                                                           | 0.36 × 0.35 × 0.32                                                           | 0.56 × 0.53 × 0.45                                                           | 0.45 × 0.23 × 0.2                                                                                            |
| Radiation                                                    | MoK $\alpha$ ( $\lambda$ = 0.71073)                                                                          | MoK $\alpha$ ( $\lambda$ = 0.71073)                                          | MoK $\alpha$ ( $\lambda$ = 0.71073)                                          | MoK $\alpha$ ( $\lambda$ = 0.71073)                                                                          |
| 2 $\theta$ range for data collection/°                       | 2.45 to 50.876                                                                                               | 3.604 to 50.698                                                              | 4.082 to 50.952                                                              | 3.844 to 51.968                                                                                              |
| Index ranges                                                 | -13 ≤ <i>h</i> ≤ 14, -14 ≤ <i>k</i> ≤ 16, 0 ≤ <i>l</i> ≤ 21                                                  | -29 ≤ <i>h</i> ≤ 29, -14 ≤ <i>k</i> ≤ 14, -21 ≤ <i>l</i> ≤ 21                | -25 ≤ <i>h</i> ≤ 29, -15 ≤ <i>k</i> ≤ 14, -21 ≤ <i>l</i> ≤ 21                | -30 ≤ <i>h</i> ≤ 30, -14 ≤ <i>k</i> ≤ 14, -17 ≤ <i>l</i> ≤ 21                                                |
| Reflections collected                                        | 8187                                                                                                         | 34629                                                                        | 21459                                                                        | 15735                                                                                                        |
| Independent reflections                                      | 8187 [ <i>R</i> <sub>int</sub> = 0.0756, <i>R</i> <sub>sigma</sub> = 0.1345]                                 | 4515 [ <i>R</i> <sub>int</sub> = 0.0721, <i>R</i> <sub>sigma</sub> = 0.0405] | 4644 [ <i>R</i> <sub>int</sub> = 0.0511, <i>R</i> <sub>sigma</sub> = 0.0425] | 4628 [ <i>R</i> <sub>int</sub> = 0.0377, <i>R</i> <sub>sigma</sub> = 0.0336]                                 |
| Data/restraints/parameters                                   | 8187/0/556                                                                                                   | 4515/0/269                                                                   | 4644/1/348                                                                   | 4628/0/290                                                                                                   |
| Goodness-of-fit on <i>F</i> <sup>2</sup>                     | 1.228                                                                                                        | 1.157                                                                        | 1.266                                                                        | 1.094                                                                                                        |
| Final <i>R</i> indexes [ <i>I</i> ≥ 2 $\sigma$ ( <i>I</i> )] | <i>R</i> <sub>1</sub> = 0.1083, <i>wR</i> <sub>2</sub> = 0.2767                                              | <i>R</i> <sub>1</sub> = 0.1075, <i>wR</i> <sub>2</sub> = 0.2353              | <i>R</i> <sub>1</sub> = 0.0983, <i>wR</i> <sub>2</sub> = 0.2325              | <i>R</i> <sub>1</sub> = 0.0554, <i>wR</i> <sub>2</sub> = 0.1333                                              |
| Final <i>R</i> indexes [all data]                            | <i>R</i> <sub>1</sub> = 0.2030, <i>wR</i> <sub>2</sub> = 0.3533                                              | <i>R</i> <sub>1</sub> = 0.1354, <i>wR</i> <sub>2</sub> = 0.2519              | <i>R</i> <sub>1</sub> = 0.1089, <i>wR</i> <sub>2</sub> = 0.2385              | <i>R</i> <sub>1</sub> = 0.0719, <i>wR</i> <sub>2</sub> = 0.1486                                              |
| Largest diff. peak/hole / e Å <sup>-3</sup>                  | 3.51/-1.86                                                                                                   | 3.60/-1.42                                                                   | 2.02/-2.92                                                                   | 1.60/-1.72                                                                                                   |

**Table S2.** Crystal and structure refinement data for guest included Cu(I)MOF.

| Identification code | <b>1r</b>                                                              | <b>1s</b>                                                        | <b>1t</b>                                           | <b>1u</b>                                           |
|---------------------|------------------------------------------------------------------------|------------------------------------------------------------------|-----------------------------------------------------|-----------------------------------------------------|
| CCDC No             | <b>1918502</b>                                                         | <b>1918504</b>                                                   | <b>1918507</b>                                      | <b>1918501</b>                                      |
| Empirical formula   | C <sub>24</sub> H <sub>19</sub> Br <sub>1.25</sub> CuIN <sub>3</sub> O | C <sub>24</sub> H <sub>22</sub> CuIN <sub>3</sub> O <sub>3</sub> | C <sub>28</sub> H <sub>22</sub> CuIN <sub>3</sub> O | C <sub>29</sub> H <sub>24</sub> CuIN <sub>3</sub> O |
| Formula weight      | 655.75                                                                 | 590.88                                                           | 606.92                                              | 620.95                                              |
| Temperature/K       | 100                                                                    | 100                                                              | 100                                                 | 100                                                 |
| Crystal system      | monoclinic                                                             | monoclinic                                                       | monoclinic                                          | monoclinic                                          |
| Space group         | <i>C</i> 2/ <i>c</i>                                                   | <i>I</i> 2/ <i>c</i>                                             | <i>C</i> 2/ <i>c</i>                                | <i>C</i> 2/ <i>c</i>                                |
| <i>a</i> /Å         | 24.3244(9)                                                             | 18.180(2)                                                        | 23.696(4)                                           | 23.8568(9)                                          |
| <i>b</i> /Å         | 12.2780(5)                                                             | 11.8500(10)                                                      | 12.9253(19)                                         | 12.7232(5)                                          |
| <i>c</i> /Å         | 17.7756(6)                                                             | 24.082(3)                                                        | 17.710(3)                                           | 17.6759(7)                                          |
| $\alpha$ /°         | 90                                                                     | 90                                                               | 90                                                  | 90                                                  |
| $\beta$ /°          | 112.772(2)                                                             | 109.299(8)                                                       | 111.762(2)                                          | 112.562(2)                                          |
| $\gamma$ /°         | 90                                                                     | 90                                                               | 90                                                  | 90                                                  |

|                                             |                                                               |                                                               |                                                               |                                                              |
|---------------------------------------------|---------------------------------------------------------------|---------------------------------------------------------------|---------------------------------------------------------------|--------------------------------------------------------------|
| Volume/Å <sup>3</sup>                       | 4895.0(3)                                                     | 4896.5(9)                                                     | 5037.4(13)                                                    | 4954.6(3)                                                    |
| Z                                           | 8                                                             | 8                                                             | 8                                                             | 8                                                            |
| $\rho_{\text{calc}}/\text{g/cm}^3$          | 1.78                                                          | 1.603                                                         | 1.601                                                         | 1.665                                                        |
| $\mu/\text{mm}^{-1}$                        | 4.215                                                         | 2.182                                                         | 2.118                                                         | 2.156                                                        |
| F(000)                                      | 2542                                                          | 2344                                                          | 2408                                                          | 2472                                                         |
| Crystal size/mm <sup>3</sup>                | 0.35 × 0.25 × 0.2                                             | 0.25 × 0.24 × 0.23                                            | 0.42 × 0.23 × 0.21                                            | 0.18 × 0.15 × 0.12                                           |
| Radiation                                   | MoK $\alpha$ ( $\lambda$ = 0.71073)                           | MoK $\alpha$ ( $\lambda$ = 0.71073)                           | MoK $\alpha$ ( $\lambda$ = 0.71073)                           | MoK $\alpha$ ( $\lambda$ = 0.71073)                          |
| 2 $\theta$ range for data collection/°      | 3.632 to 50.896                                               | 3.876 to 51.484                                               | 3.654 to 53.464                                               | 3.696 to 56.754                                              |
| Index ranges                                | -29 ≤ h ≤ 29, -14 ≤ k ≤ 14, -21 ≤ l ≤ 21                      | -21 ≤ h ≤ 21, -14 ≤ k ≤ 14, -27 ≤ l ≤ 29                      | -29 ≤ h ≤ 29, -16 ≤ k ≤ 16, -22 ≤ l ≤ 22                      | -29 ≤ h ≤ 29, -16 ≤ k ≤ 16, -22 ≤ l ≤ 22                     |
| Reflections collected                       | 25810                                                         | 40513                                                         | 62642                                                         | 6150                                                         |
| Independent reflections                     | 4524 [R <sub>int</sub> = 0.0573, R <sub>sigma</sub> = 0.0461] | 4584 [R <sub>int</sub> = 0.1277, R <sub>sigma</sub> = 0.0583] | 5359 [R <sub>int</sub> = 0.0399, R <sub>sigma</sub> = 0.0187] | 6150 [R <sub>int</sub> = 0.064, R <sub>sigma</sub> = 0.0414] |
| Data/restraints/parameters                  | 4524/1/276                                                    | 4584/1/266                                                    | 5359/0/269                                                    | 6150/1/296                                                   |
| Goodness-of-fit on F <sup>2</sup>           | 1.043                                                         | 1.168                                                         | 1.071                                                         | 1.074                                                        |
| Final R indexes [I ≥ 2 $\sigma$ (I)]        | R <sub>1</sub> = 0.1049, wR <sub>2</sub> = 0.2730             | R <sub>1</sub> = 0.1348, wR <sub>2</sub> = 0.2927             | R <sub>1</sub> = 0.0641, wR <sub>2</sub> = 0.1358             | R <sub>1</sub> = 0.0457, wR <sub>2</sub> = 0.1227            |
| Final R indexes [all data]                  | R <sub>1</sub> = 0.1396, wR <sub>2</sub> = 0.3033             | R <sub>1</sub> = 0.1494, wR <sub>2</sub> = 0.3017             | R <sub>1</sub> = 0.0810, wR <sub>2</sub> = 0.1507             | R <sub>1</sub> = 0.0633, wR <sub>2</sub> = 0.1341            |
| Largest diff. peak/hole / e Å <sup>-3</sup> | 4.49/-3.43                                                    | 2.51/-3.79                                                    | 2.15/-1.24                                                    | 1.15/-1.04                                                   |

**Table S3.** Crystal and structure refinement data for guest included Cu(I)MOF.

| Identification code                    | <b>1v</b>                                                             | <b>1w</b>                                                                                    | <b>1x</b>                                                     |
|----------------------------------------|-----------------------------------------------------------------------|----------------------------------------------------------------------------------------------|---------------------------------------------------------------|
| CCDC No                                | <b>1918506</b>                                                        | <b>1918503</b>                                                                               | <b>1918505</b>                                                |
| Empirical formula                      | C <sub>28</sub> H <sub>21</sub> Cl <sub>1.5</sub> CuIN <sub>3</sub> O | C <sub>56</sub> H <sub>48</sub> Cu <sub>2</sub> I <sub>2</sub> N <sub>8</sub> O <sub>2</sub> | C <sub>29</sub> H <sub>22.64</sub> CuIN <sub>4</sub> O        |
| Formula weight                         | 659.09                                                                | 1245.9                                                                                       | 633.59                                                        |
| Temperature/K                          | 100                                                                   | 100                                                                                          | 100                                                           |
| Crystal system                         | monoclinic                                                            | triclinic                                                                                    | monoclinic                                                    |
| Space group                            | C2/c                                                                  | P-1                                                                                          | C2/c                                                          |
| a/Å                                    | 23.9180(9)                                                            | 12.5064(12)                                                                                  | 24.2935(9)                                                    |
| b/Å                                    | 12.7420(5)                                                            | 13.6759(12)                                                                                  | 12.6330(5)                                                    |
| c/Å                                    | 17.8041(7)                                                            | 17.5120(16)                                                                                  | 17.7632(6)                                                    |
| $\alpha$ /°                            | 90                                                                    | 109.965(4)                                                                                   | 90                                                            |
| $\beta$ /°                             | 112.848(2)                                                            | 89.613(4)                                                                                    | 113.0070(10)                                                  |
| $\gamma$ /°                            | 90                                                                    | 114.963(4)                                                                                   | 90                                                            |
| Volume/Å <sup>3</sup>                  | 5000.3(3)                                                             | 2518.8(4)                                                                                    | 5017.9(3)                                                     |
| Z                                      | 8                                                                     | 2                                                                                            | 8                                                             |
| $\rho_{\text{calc}}/\text{g/cm}^3$     | 1.751                                                                 | 1.643                                                                                        | 1.677                                                         |
| $\mu/\text{mm}^{-1}$                   | 2.296                                                                 | 2.121                                                                                        | 2.131                                                         |
| F(000)                                 | 2604                                                                  | 1240                                                                                         | 2517                                                          |
| Crystal size/mm <sup>3</sup>           | 0.45 × 0.35 × 0.3                                                     | 0.45 × 0.4 × 0.4                                                                             | 0.35 × 0.25 × 0.25                                            |
| Radiation                              | MoK $\alpha$ ( $\lambda$ = 0.71073)                                   | MoK $\alpha$ ( $\lambda$ = 0.71073)                                                          | MoK $\alpha$ ( $\lambda$ = 0.71073)                           |
| 2 $\theta$ range for data collection/° | 3.692 to 51.158                                                       | 4.074 to 50.742                                                                              | 4.844 to 50.734                                               |
| Index ranges                           | -27 ≤ h ≤ 28, -15 ≤ k ≤ 15, -21 ≤ l ≤ 21                              | -15 ≤ h ≤ 15, -16 ≤ k ≤ 15, 0 ≤ l ≤ 21                                                       | -29 ≤ h ≤ 29, -15 ≤ k ≤ 15, -20 ≤ l ≤ 21                      |
| Reflections collected                  | 22626                                                                 | 8943                                                                                         | 24478                                                         |
| Independent reflections                | 4660 [R <sub>int</sub> = 0.0381, R <sub>sigma</sub> = 0.0311]         | 8943 [R <sub>int</sub> = 0.0504, R <sub>sigma</sub> = 0.0523]                                | 4606 [R <sub>int</sub> = 0.0674, R <sub>sigma</sub> = 0.0441] |

|                                                |                                  |                                  |                                  |
|------------------------------------------------|----------------------------------|----------------------------------|----------------------------------|
| Data/restraints/parameters                     | 4660/21/287                      | 8943/0/636                       | 4606/1/321                       |
| Goodness-of-fit on $F^2$                       | 1.035                            | 1.109                            | 1.047                            |
| Final R indexes [ $I \geq 2\sigma$ (I)]        | $R_1 = 0.0812$ , $wR_2 = 0.2275$ | $R_1 = 0.0477$ , $wR_2 = 0.0973$ | $R_1 = 0.0662$ , $wR_2 = 0.1755$ |
| Final R indexes [all data]                     | $R_1 = 0.1017$ , $wR_2 = 0.2560$ | $R_1 = 0.0730$ , $wR_2 = 0.1148$ | $R_1 = 0.0779$ , $wR_2 = 0.1907$ |
| Largest diff. peak/hole / $e \text{ \AA}^{-3}$ | 2.22/-2.52                       | 1.44/-1.46                       | 2.10/-4.97                       |

**Table S4.** Crystal and structure refinement data for guest included Cu(I)MOF.

| Identification code                            | <b>1y</b>                                                          | <b>1z</b>                                                          |
|------------------------------------------------|--------------------------------------------------------------------|--------------------------------------------------------------------|
| CCDC No                                        | <b>1918509</b>                                                     | <b>1918508</b>                                                     |
| Empirical formula                              | $C_{56}H_{45}Cu_2I_2N_7O_2$                                        | $C_{22}H_{17}CuIN_3O_2$                                            |
| Formula weight                                 | 1228.87                                                            | 545.82                                                             |
| Temperature/K                                  | 100                                                                | 100                                                                |
| Crystal system                                 | monoclinic                                                         | monoclinic                                                         |
| Space group                                    | $P2_1/c$                                                           | $C2/c$                                                             |
| a/ $\text{\AA}$                                | 23.5760(19)                                                        | 24.184(10)                                                         |
| b/ $\text{\AA}$                                | 12.8738(11)                                                        | 12.642(6)                                                          |
| c/ $\text{\AA}$                                | 17.7114(14)                                                        | 17.903(8)                                                          |
| $\alpha/^\circ$                                | 90                                                                 | 90                                                                 |
| $\beta/^\circ$                                 | 110.880(2)                                                         | 113.189(4)                                                         |
| $\gamma/^\circ$                                | 90                                                                 | 90                                                                 |
| Volume/ $\text{\AA}^3$                         | 5022.6(7)                                                          | 5031(4)                                                            |
| Z                                              | 4                                                                  | 8                                                                  |
| $\rho_{\text{calc}}/\text{g cm}^{-3}$          | 1.625                                                              | 1.441                                                              |
| $\mu/\text{mm}^{-1}$                           | 2.126                                                              | 2.114                                                              |
| F(000)                                         | 2440                                                               | 2144                                                               |
| Crystal size/ $\text{mm}^3$                    | $0.26 \times 0.25 \times 0.21$                                     | $0.23 \times 0.21 \times 0.2$                                      |
| Radiation                                      | MoK $\alpha$ ( $\lambda = 0.71073$ )                               | MoK $\alpha$ ( $\lambda = 0.71073$ )                               |
| 2 $\Theta$ range for data collection/ $^\circ$ | 4.6 to 50.742                                                      | 3.664 to 51.132                                                    |
| Index ranges                                   | $-25 \leq h \leq 28$ , $-15 \leq k \leq 15$ , $-21 \leq l \leq 21$ | $-29 \leq h \leq 24$ , $-15 \leq k \leq 15$ , $-21 \leq l \leq 21$ |
| Reflections collected                          | 50502                                                              | 14932                                                              |
| Independent reflections                        | 9191 [ $R_{\text{int}} = 0.0566$ , $R_{\text{sigma}} = 0.0447$ ]   | 4667 [ $R_{\text{int}} = 0.1309$ , $R_{\text{sigma}} = 0.1446$ ]   |
| Data/restraints/parameters                     | 9191/0/625                                                         | 4667/0/272                                                         |
| Goodness-of-fit on $F^2$                       | 1.091                                                              | 1.023                                                              |
| Final R indexes [ $I \geq 2\sigma$ (I)]        | $R_1 = 0.0817$ , $wR_2 = 0.1677$                                   | $R_1 = 0.0729$ , $wR_2 = 0.2030$                                   |
| Final R indexes [all data]                     | $R_1 = 0.1322$ , $wR_2 = 0.2034$                                   | $R_1 = 0.1894$ , $wR_2 = 0.2534$                                   |
| Largest diff. peak/hole / $e \text{ \AA}^{-3}$ | 2.16/-1.68                                                         | 1.32/-0.74                                                         |

$$^a R_1 = \sum \|F_o| - |F_c|\| / \sum |F_o|. \quad ^b R_2 = [\sum \{w(F_o^2 - F_c^2)^2\} / \sum \{w(F_o^2)^2\}]^{1/2}$$

**Underlying Net topology analysis:** The parent MOF contains a  $\text{Cu}_2\text{I}_2$  cluster with four centered node (4c) and the ligand is two centered node (2c). When we consider  $\text{Cu}_2\text{I}_2$  as propagating node alone with 2c ligand node it shows (Topological type: hcb; Shubnikov hexagonal plane net/(6,3) Point symbol for net:  $\{6^3\}$  3-c net; uninodal net) as shown in Figure S7. Then we simplify the  $\text{Cu}_2\text{I}_2$  as a point that is this cluster were simplified to a point (4c) and ligand was considered as 2c point and the observed topology is Topological type: (sql/Shubnikov tetragonal plane net Point symbol for net:  $\{4^4.6^2\}$  4-c net; uninodal net) (Figure S8).

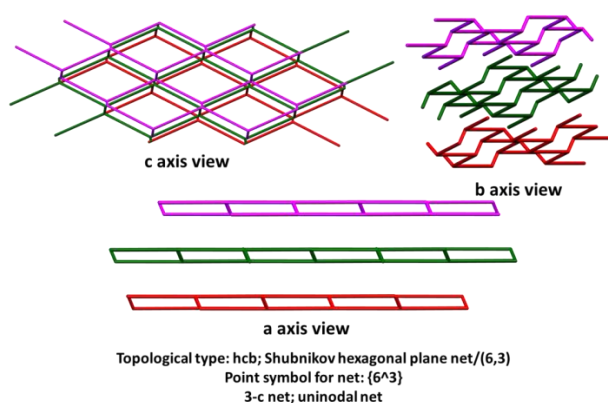

**Figure S7.** Topological analysis of the parent MOF (1) before cluster simplification.

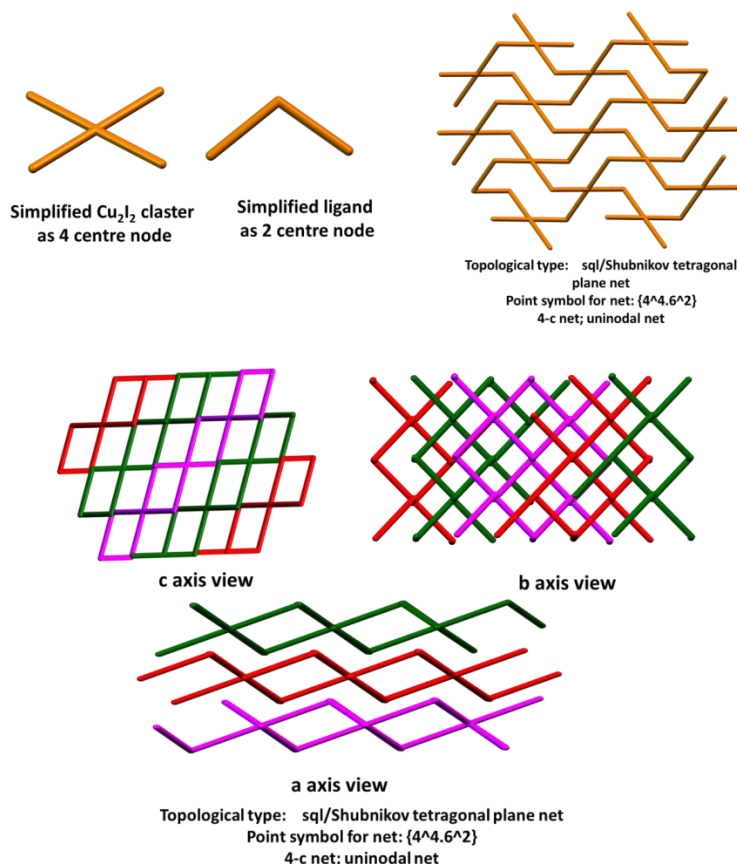

**Figure S8.** Topological analysis of the parent MOF (1) after cluster simplification.

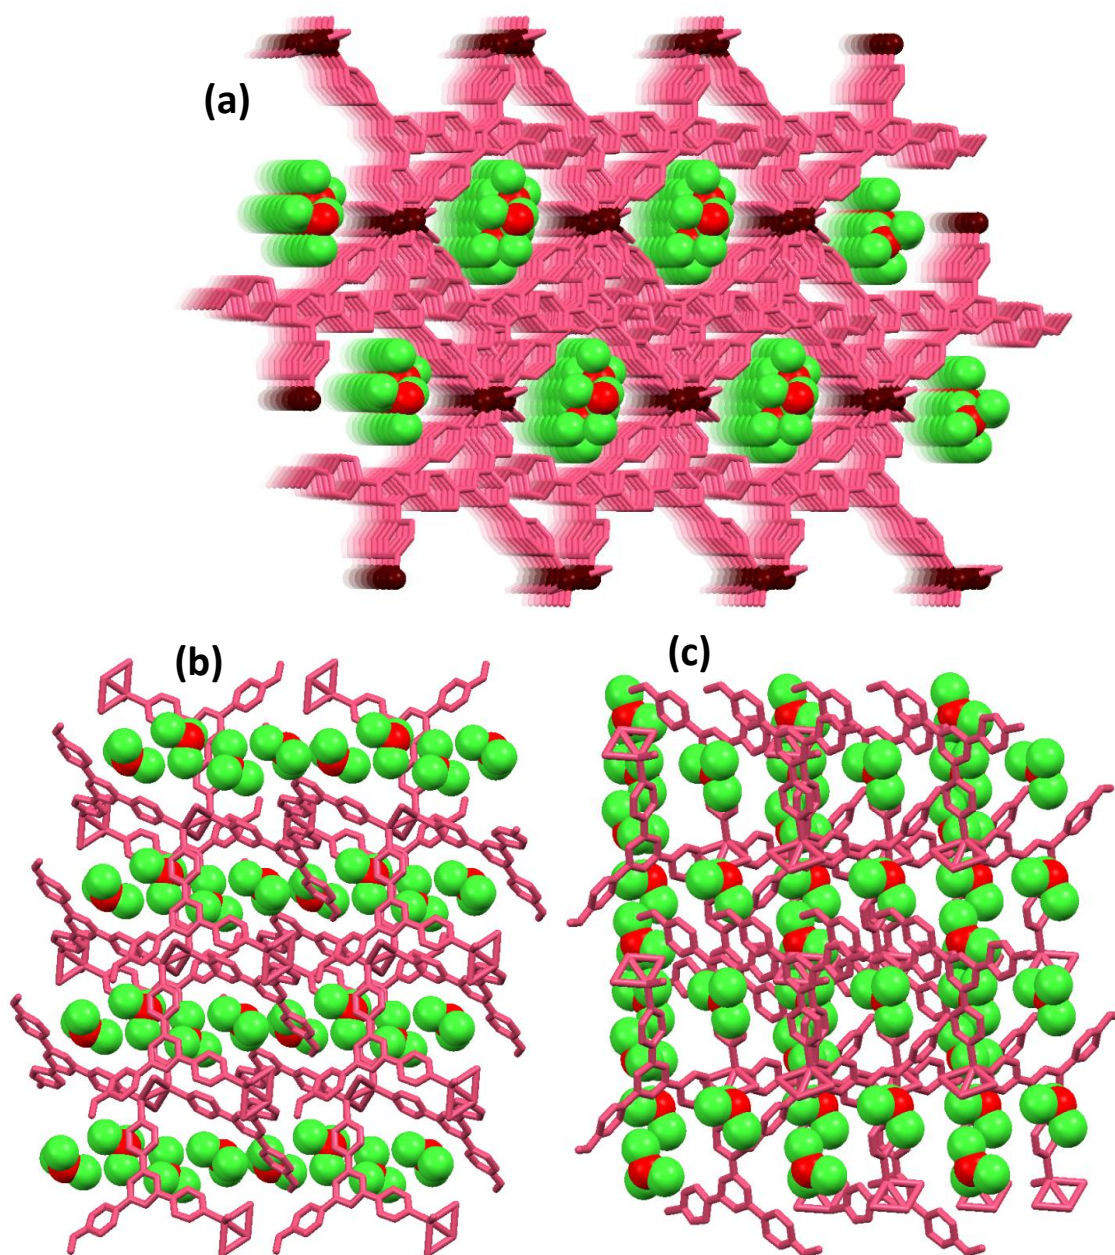

**Figure S9.** Solid state packing diagram of  $\text{CHCl}_3$  molecules in  $\text{CHCl}_3@ \text{Cu(I)MOF}$  (a) down the  $C$ -axis; (b)-(c) zigzag arrangement of  $\text{CHCl}_3$  molecules along the  $b$  and  $c$ -axes.

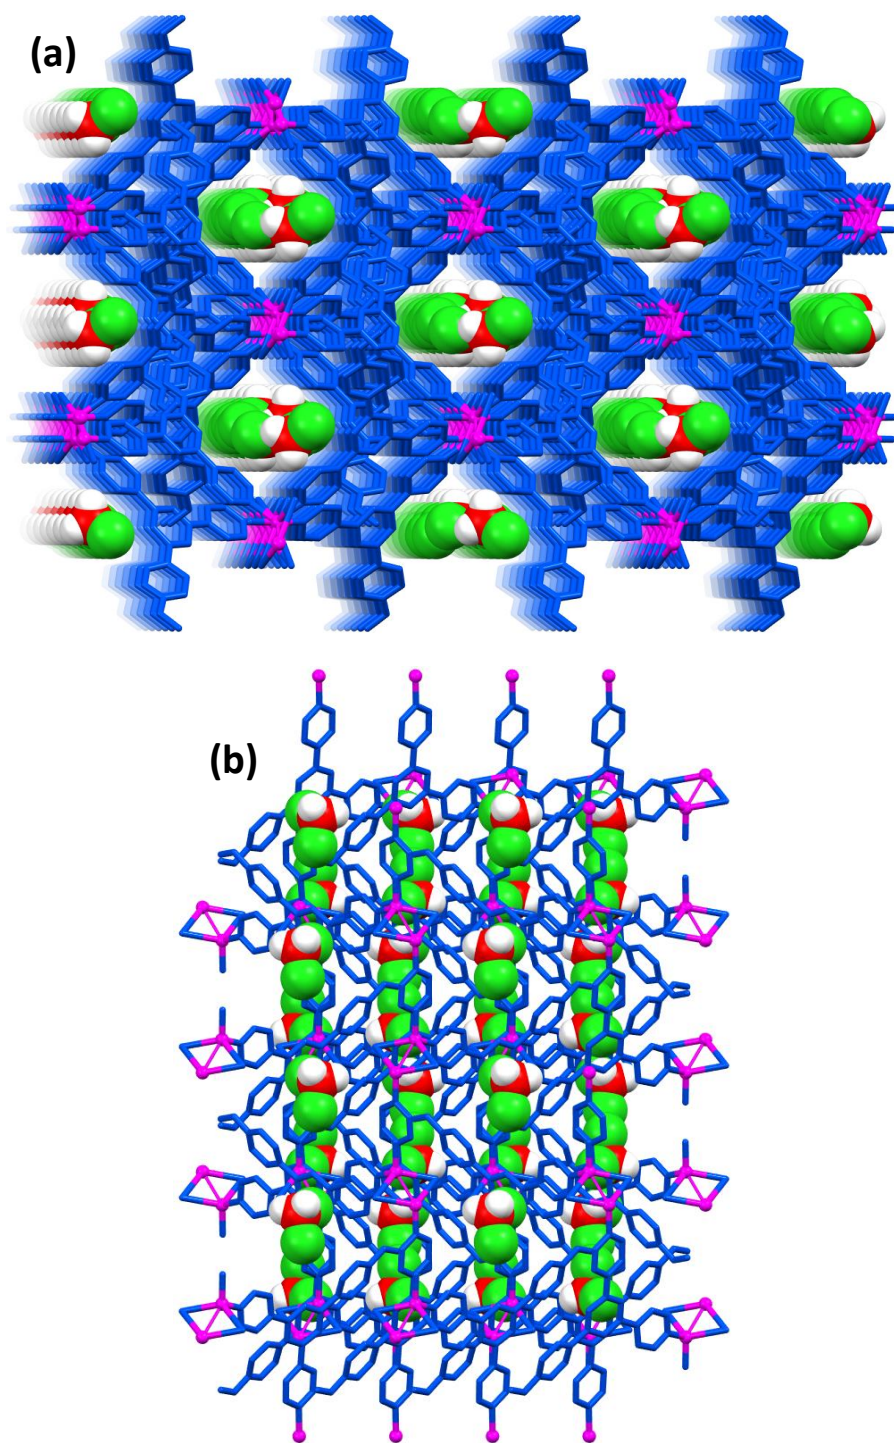

**Figure S10.** Solid state packing diagram of  $\text{CH}_2\text{Cl}_2$  molecules in  $\text{CH}_2\text{Cl}_2@ \text{Cu(I)MOF}$  (a) down the  $c$ -axis; (b) zigzag arrangement of  $\text{CH}_2\text{Cl}_2$  molecules along the  $b$ -axis.

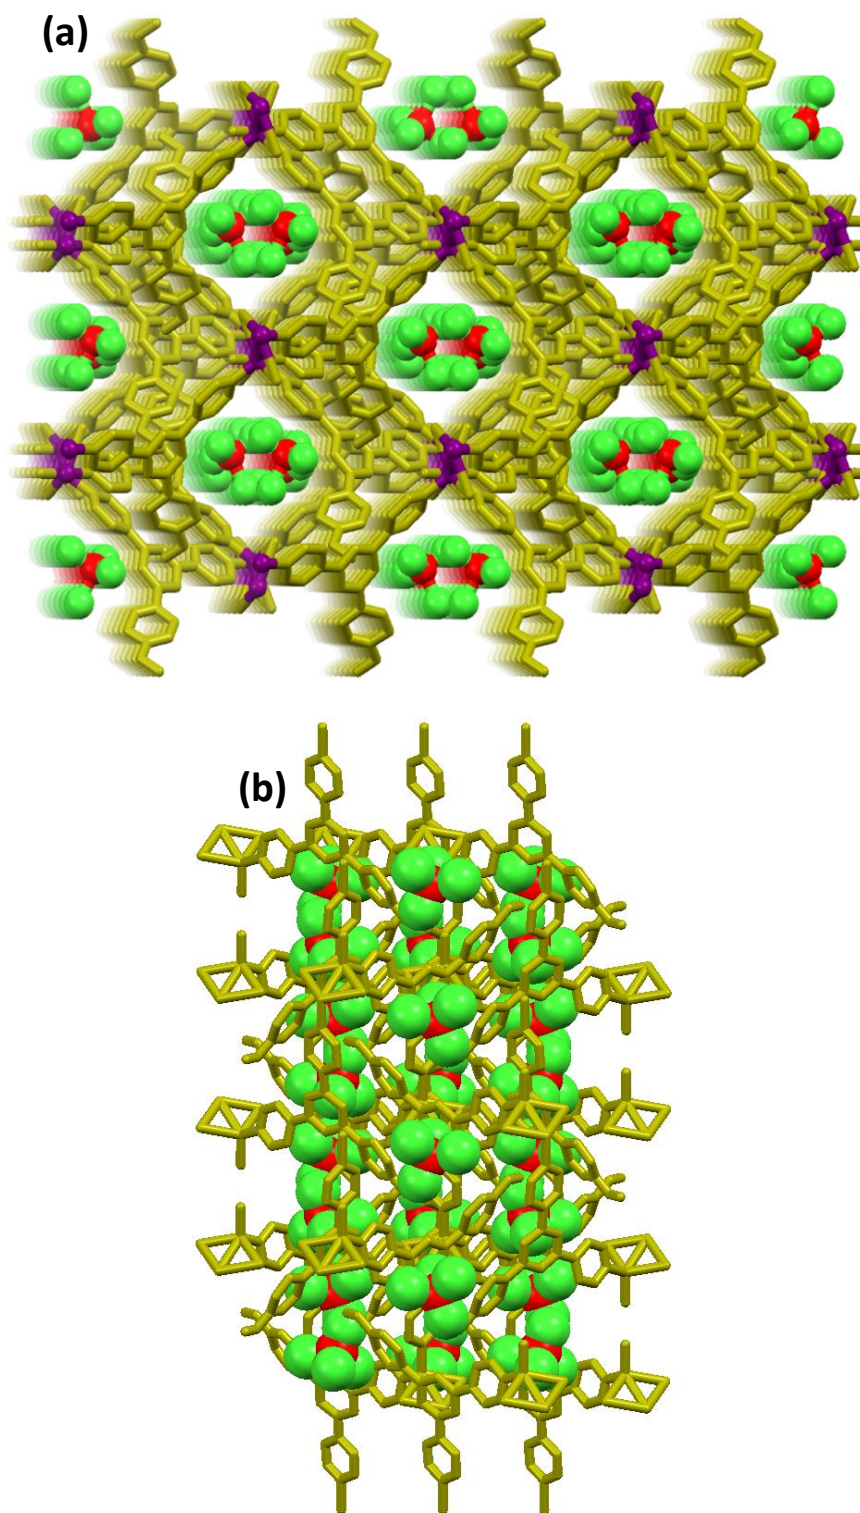

**Figure S11.** Solid state packing diagram of  $\text{CCl}_4$  molecules in  $\text{CCl}_4@ \text{Cu(I)MOF}$  (a) down the  $c$ -axis; (b) zigzag arrangement of  $\text{CCl}_4$  molecules along the  $b$ -axis.

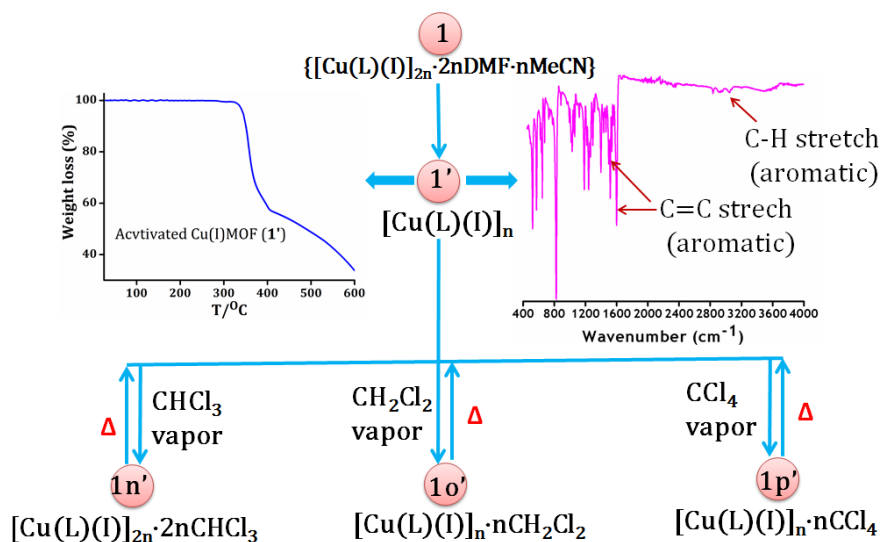

**Scheme S1.** Conversion of **1** to solvent free framework (**1'**) and reversible adsorption and desorption of volatile organic solvents.

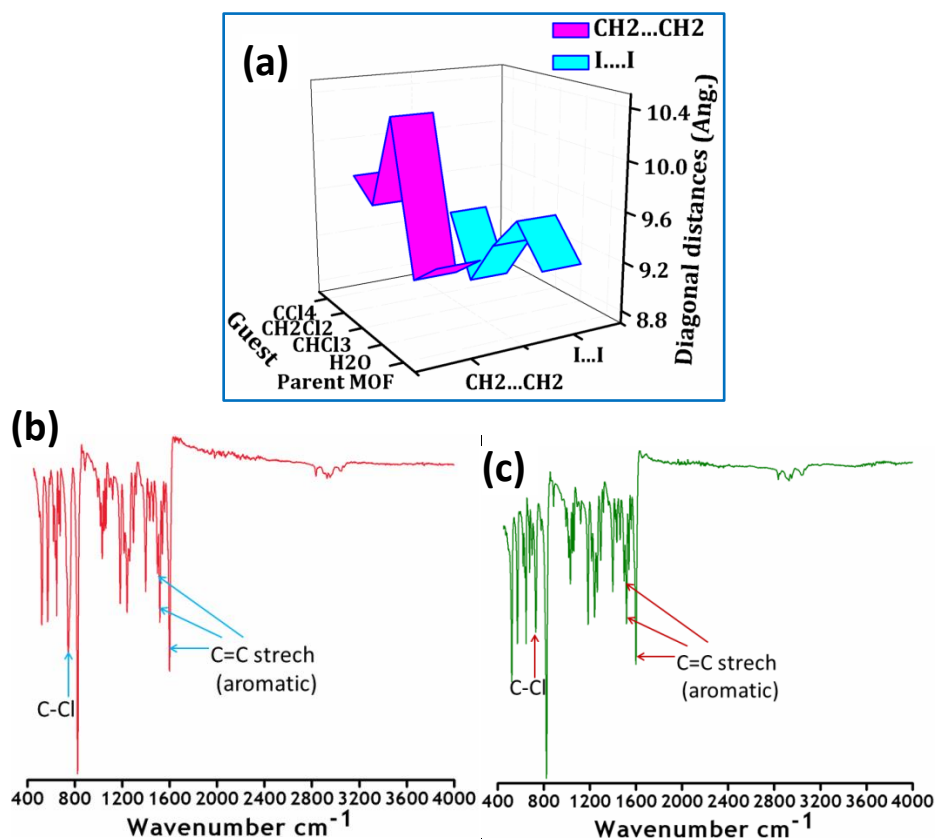

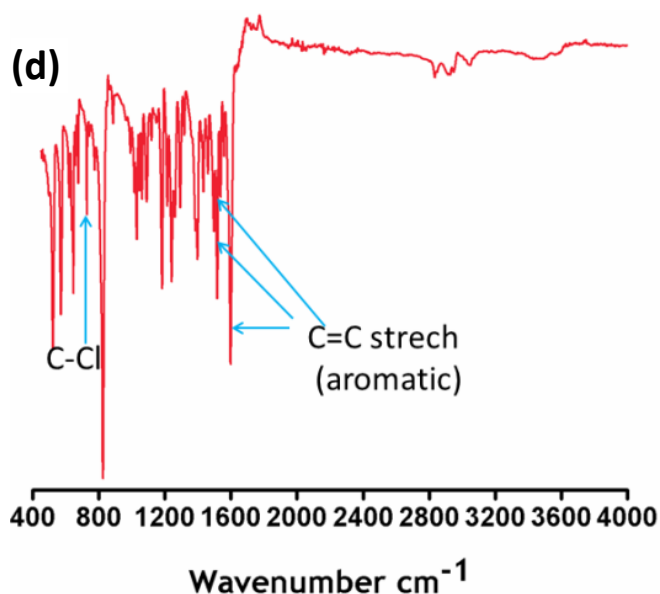

During reversible encapsulation and exclusion of the volatile solvent molecules, PXRD pattern changes. This might be due to mechanical sliding of the intertwined 2D frameworks (Figure S12d) leading to breathing behavior of the framework of Cu(I)MOF (**1**).

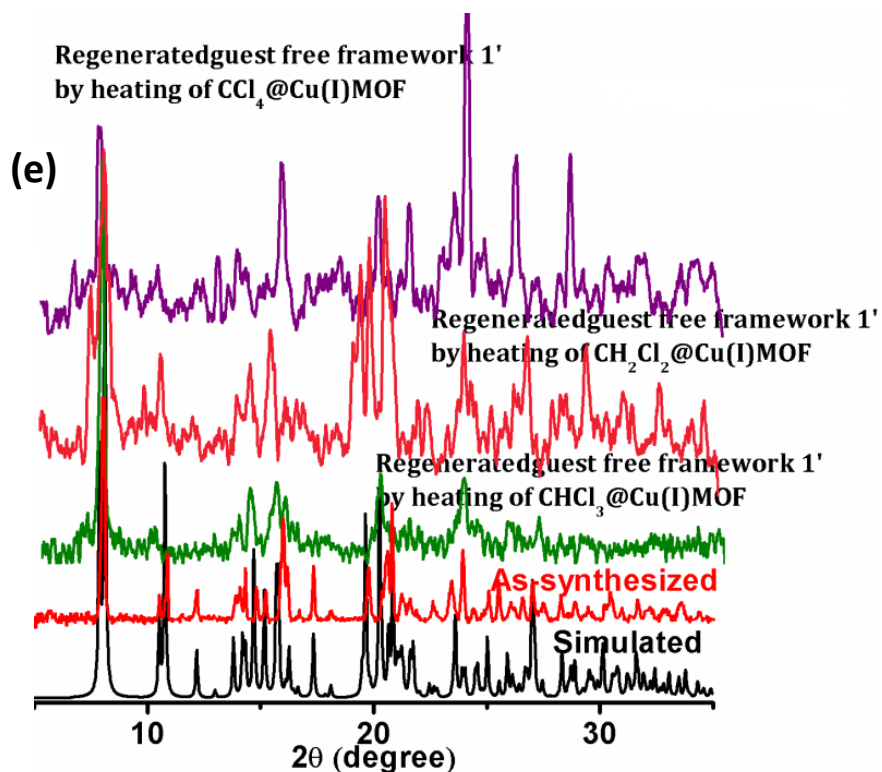

**Figure S12.** (a): Variation of pore dimension of **1** upon inclusion of DCE, DBE and glycol; (b-d): IR spectra of **1n'**, **1o'** and **1p'** obtained from **1'**; (e): PXRD of the regenerated guest free framework of **1'** by heating the volatile solvent included Cu(I)MOF.

**Table S5.** Variation of pore dimension upon inclusion of the guest molecules in 1D nanopore of the parent MOF (**1**).

| Incorporated guest in Cu(I)MOF                      | CH2-CH2 (Å) | I2-I2 (Å) |
|-----------------------------------------------------|-------------|-----------|
| DMF, MeCN (Parent MOF)                              | 9.358       | 9.179     |
| H <sub>2</sub> O                                    | 9.157       | 9.479     |
| CHCl <sub>3</sub>                                   | 10.369      | 8.954     |
| CH <sub>2</sub> Cl <sub>2</sub>                     | 9.557       | 8.767     |
| CCl <sub>4</sub>                                    | 9.720       | 9.276     |
| 1,2-dichloro ethane (DCE)                           | 9.641       | 8.811     |
| 1,2-dibromo ethane (DBE)                            | 9.490       | 9.073     |
| Ethylene glycol (glycol)                            | 9.600       | 8.503     |
| Benzene (Ph-H)                                      | 9.164       | 9.674     |
| Toluene (Ph-CH <sub>3</sub> )                       | 9.027       | 9.470     |
| 1,2-dichlorobenzene ( <i>o</i> -PhCl <sub>2</sub> ) | 9.124       | 9.535     |
| Aniline (PhNH <sub>2</sub> )                        | 10.371      | 9.466     |
| Benzylamine (PhCH <sub>2</sub> NH <sub>2</sub> )    | 9.215       | 9.455     |
| Naphthalene (naphtha), MeCN                         | 8.944       | 9.734     |

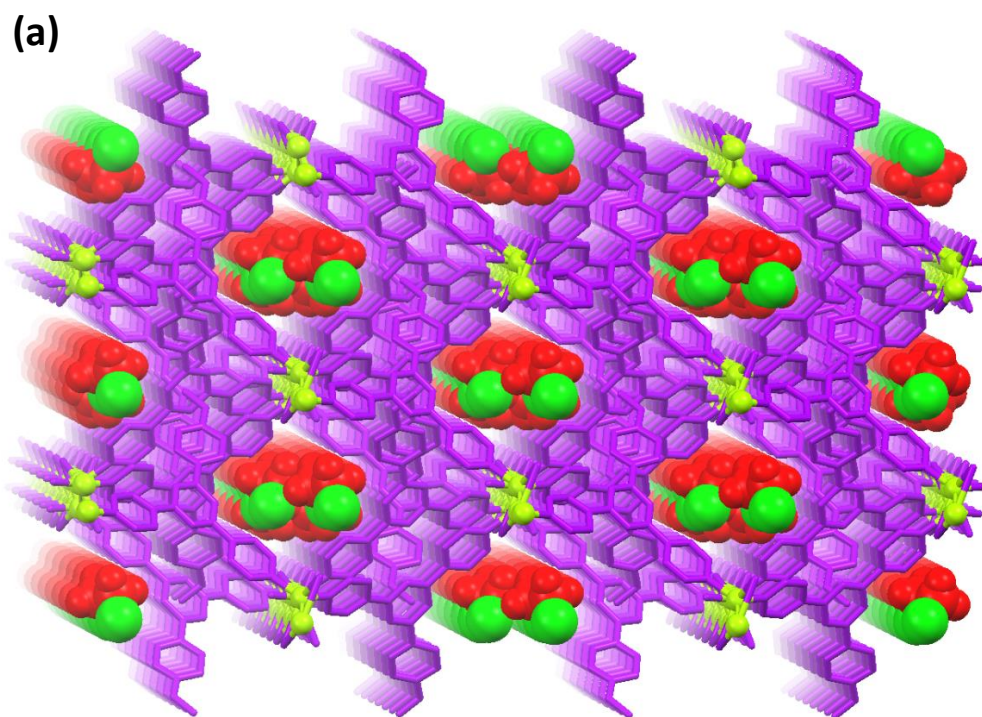

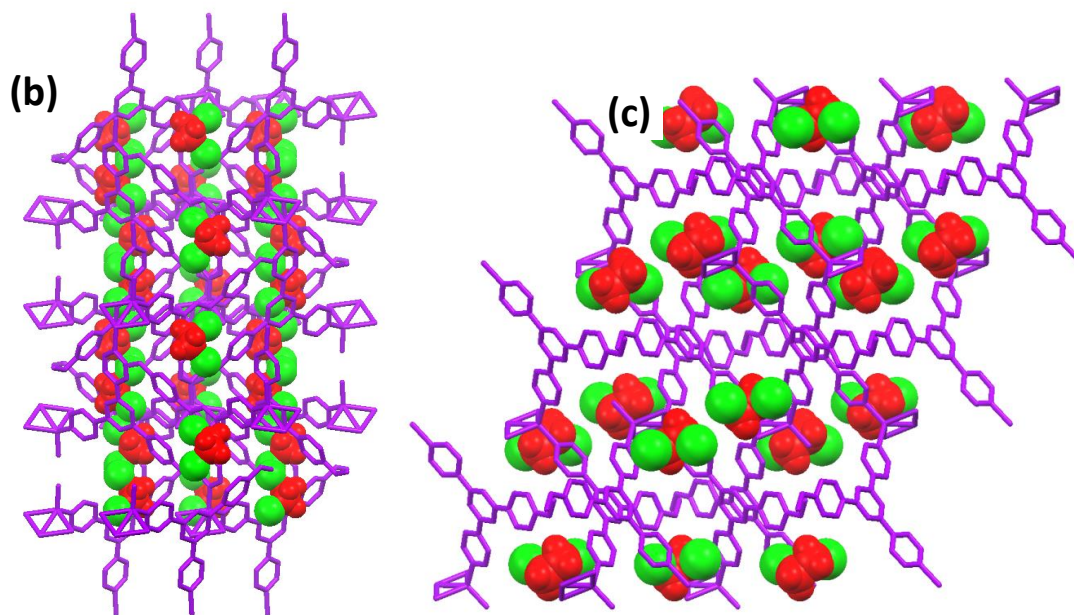

**Figure S13.** Solid state packing diagram of **DCE** molecules in **DCE@Cu(I)MOF** (a) down the *c*-axis; (b)-(c) zigzag arrangement of **DCE** molecules along the *a* and *b*-axes.

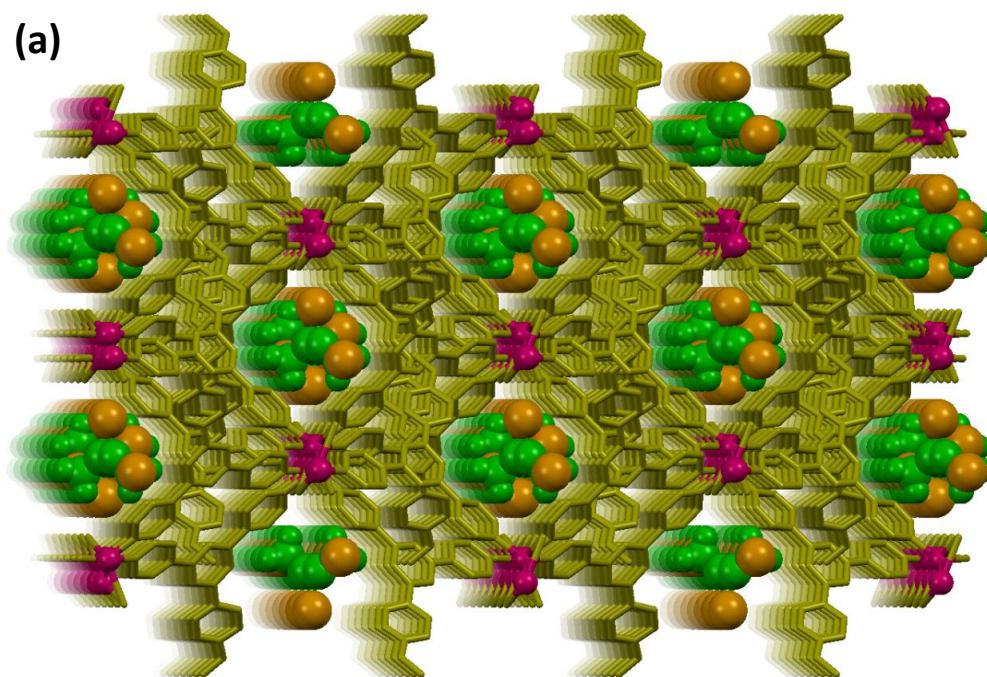

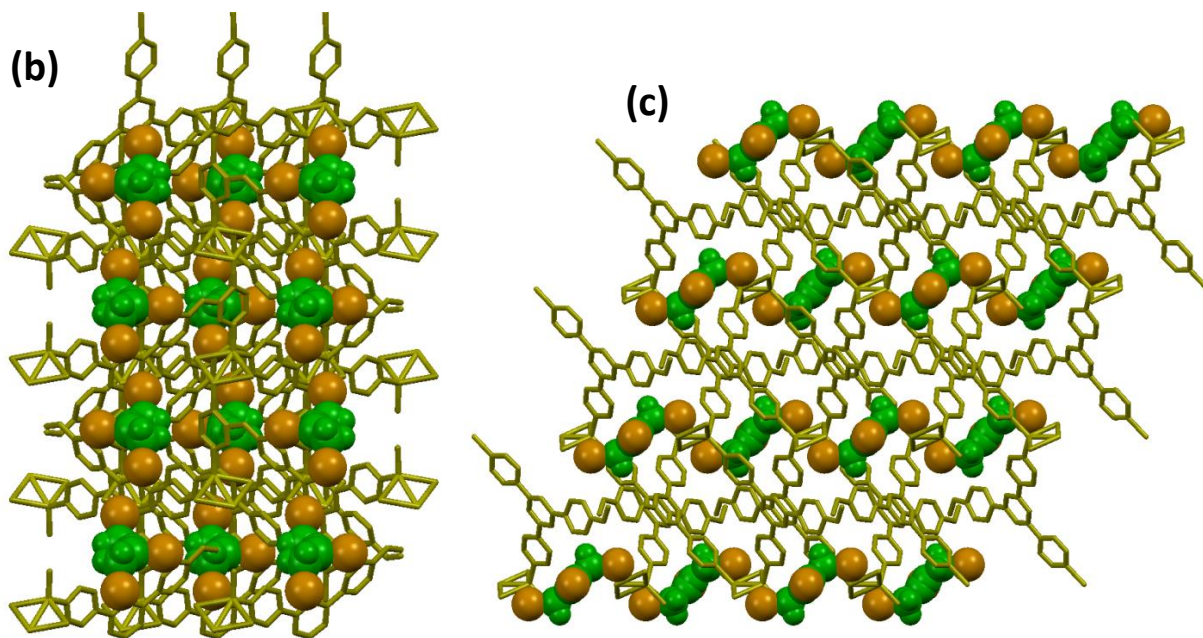

**Figure 14.** Solid state packing diagram of **DBE** molecules in **DBE@Cu(I)MOF** (a) down the *c*-axis; (b)-(c) zigzag arrangement of **DBE** molecules along the *a* and *b*-axes.

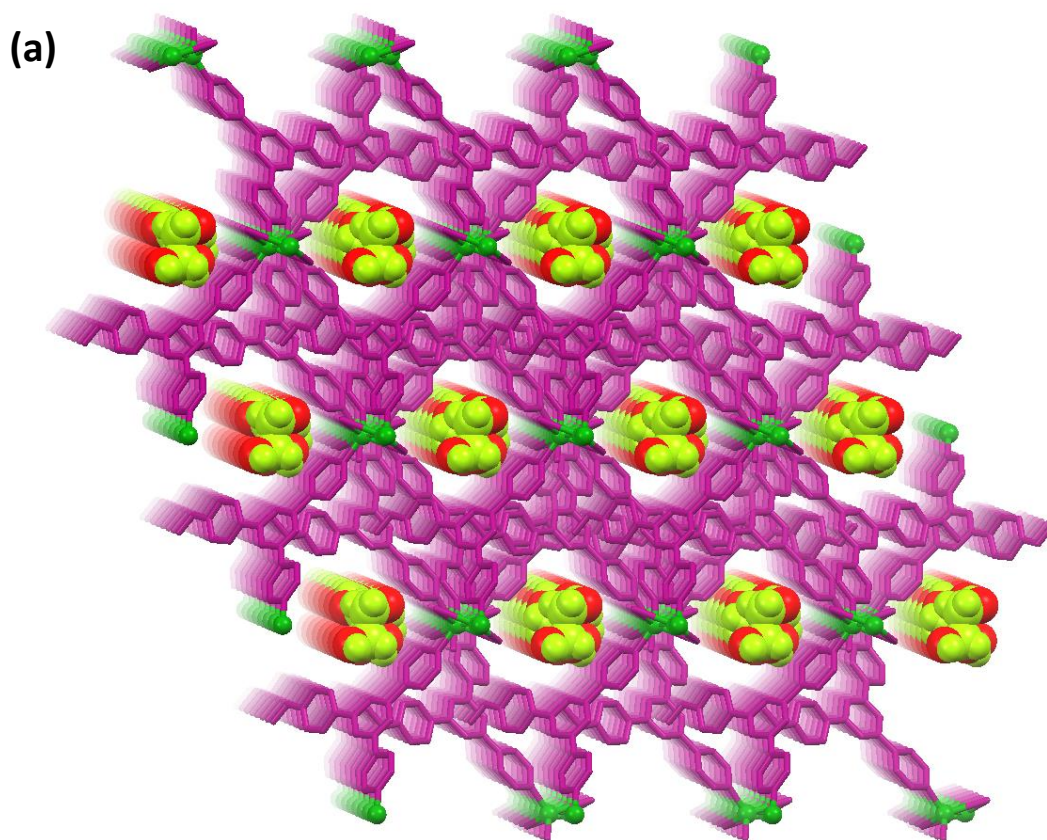

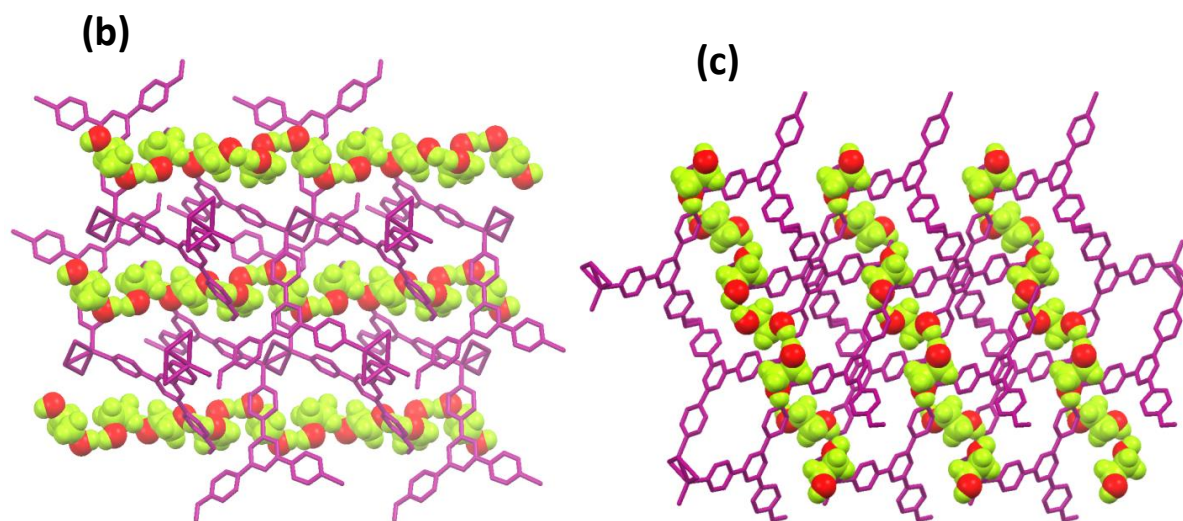

**Figure 15.** Solid state packing diagram of **glycol** molecules in **glycol@Cu(I)MOF** (a) down the *a*-axis; (b)-(c) zigzag arrangement of **glycol** molecules along the *b* and *c*-axes.

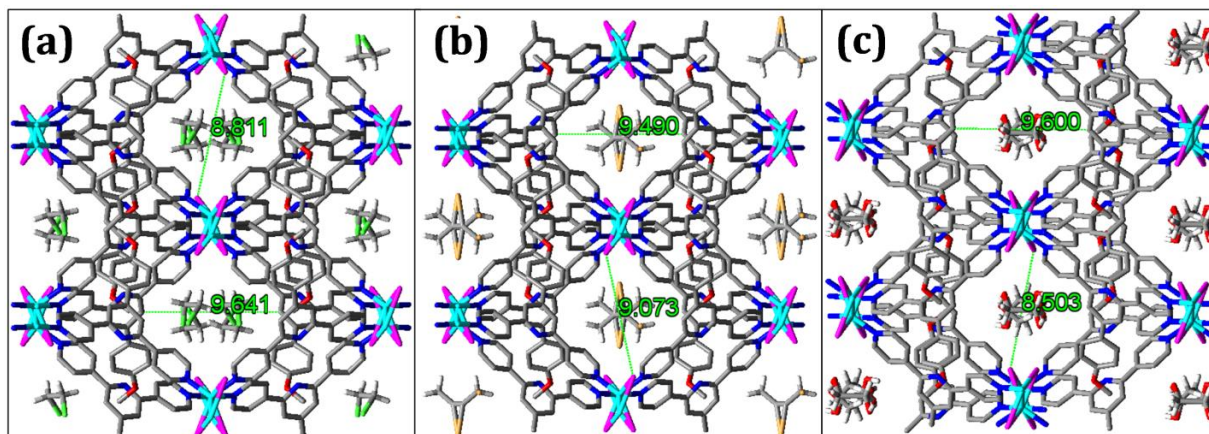

**Figure S16.** Change in hydrophilic length (I2...I2) and hydrophobic length (CH2...CH2) of **1** upon incorporation of different rotational isomers (a) DCE (b) DBE (c) glycol.

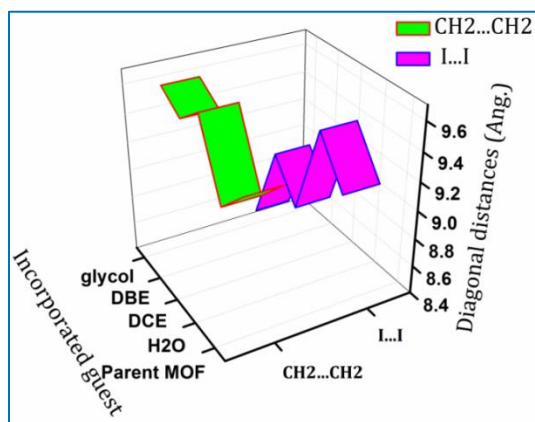

**Figure S17.** Variation of pore dimension of **1** upon inclusion of DCE, DBE and glycol.

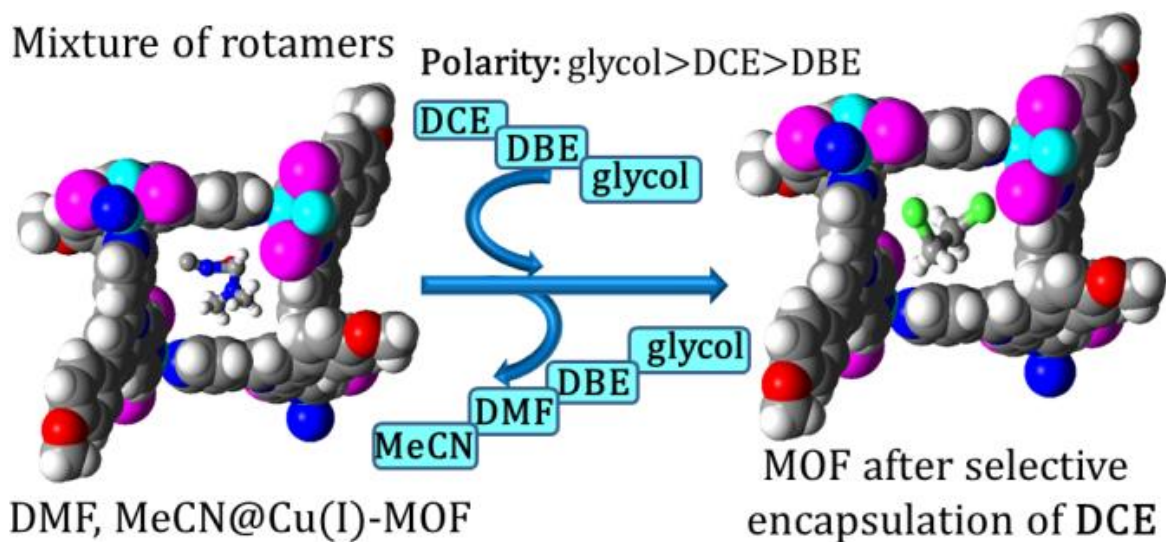

**Scheme S2.** Schematic Representation of the Selective Incorporation of DCE among Various Rotamers.

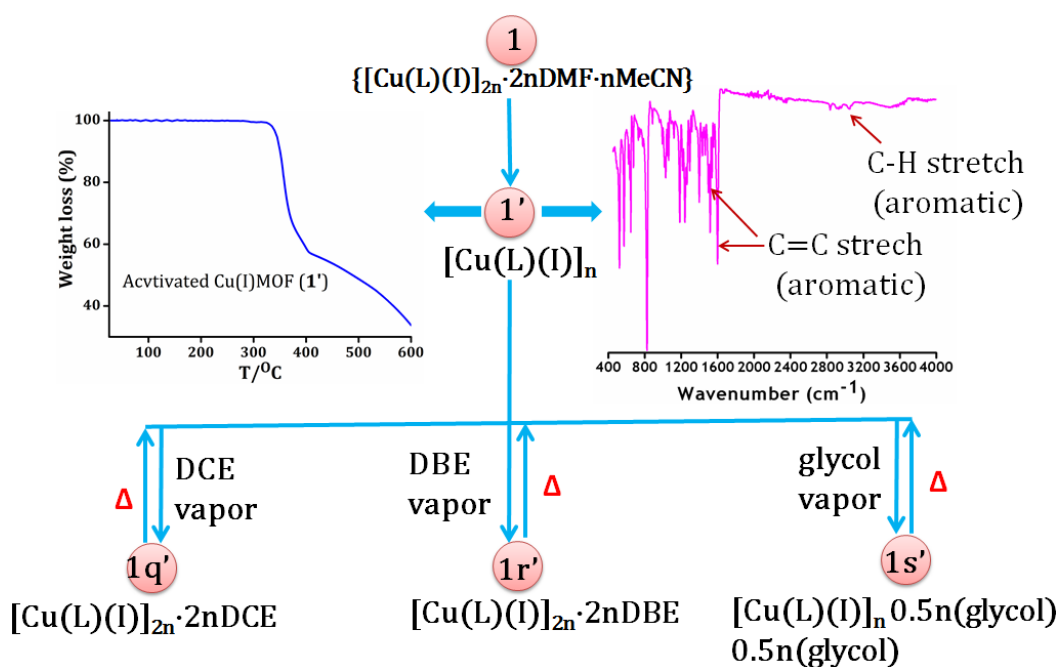

**Scheme S3.** Conversion of 1 to the desolvated framework (1') and reversible adsorption and desorption of rotational isomers.

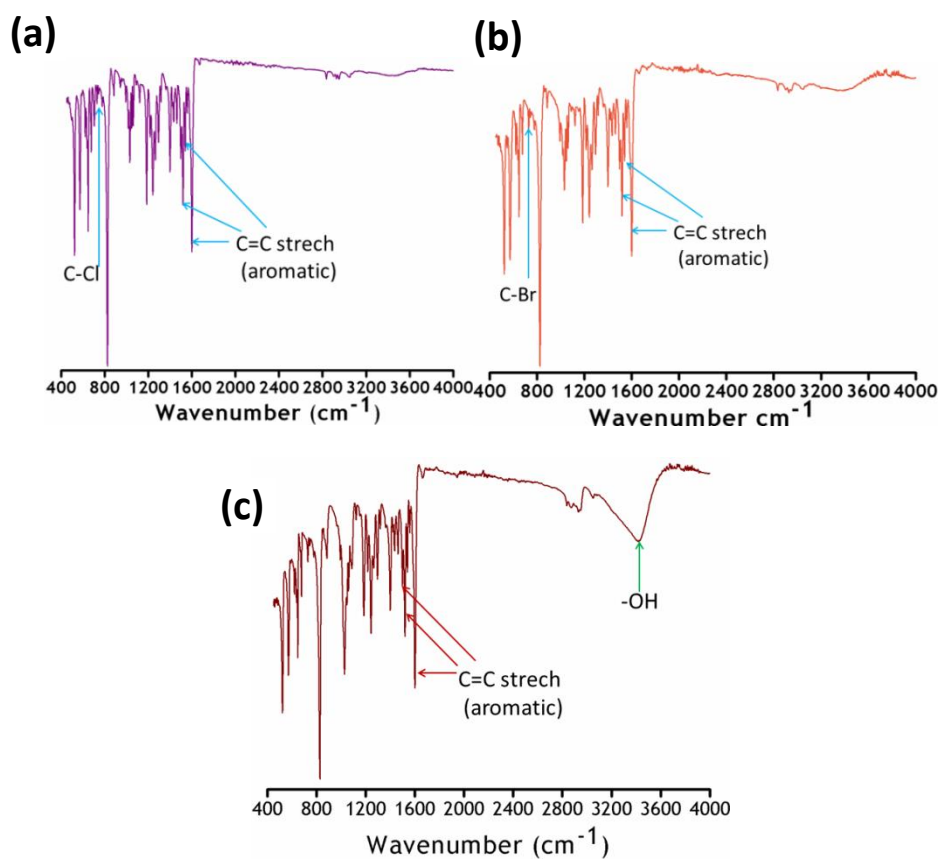

PXRD patterns change during reversible inclusion and exclusion of the rotational isomers. This can be attributed to mechanical sliding of the interpenetrated 2D frameworks (Figure S18d) leading to dynamic behavior of the framework of Cu(I)MOF.

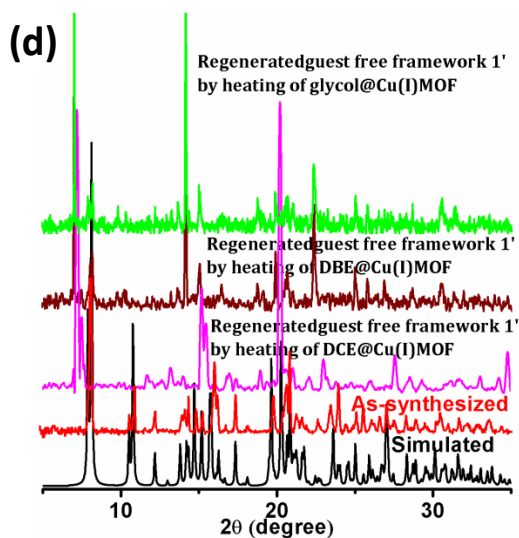

**Figure S18.** (a-c): IR spectra of **1q'**, **1r'** and **1s'** obtained from **1'**; (d): PXRD of the regenerated guest free framework of **1'** by heating the rotational isomers included Cu(I)MOF.

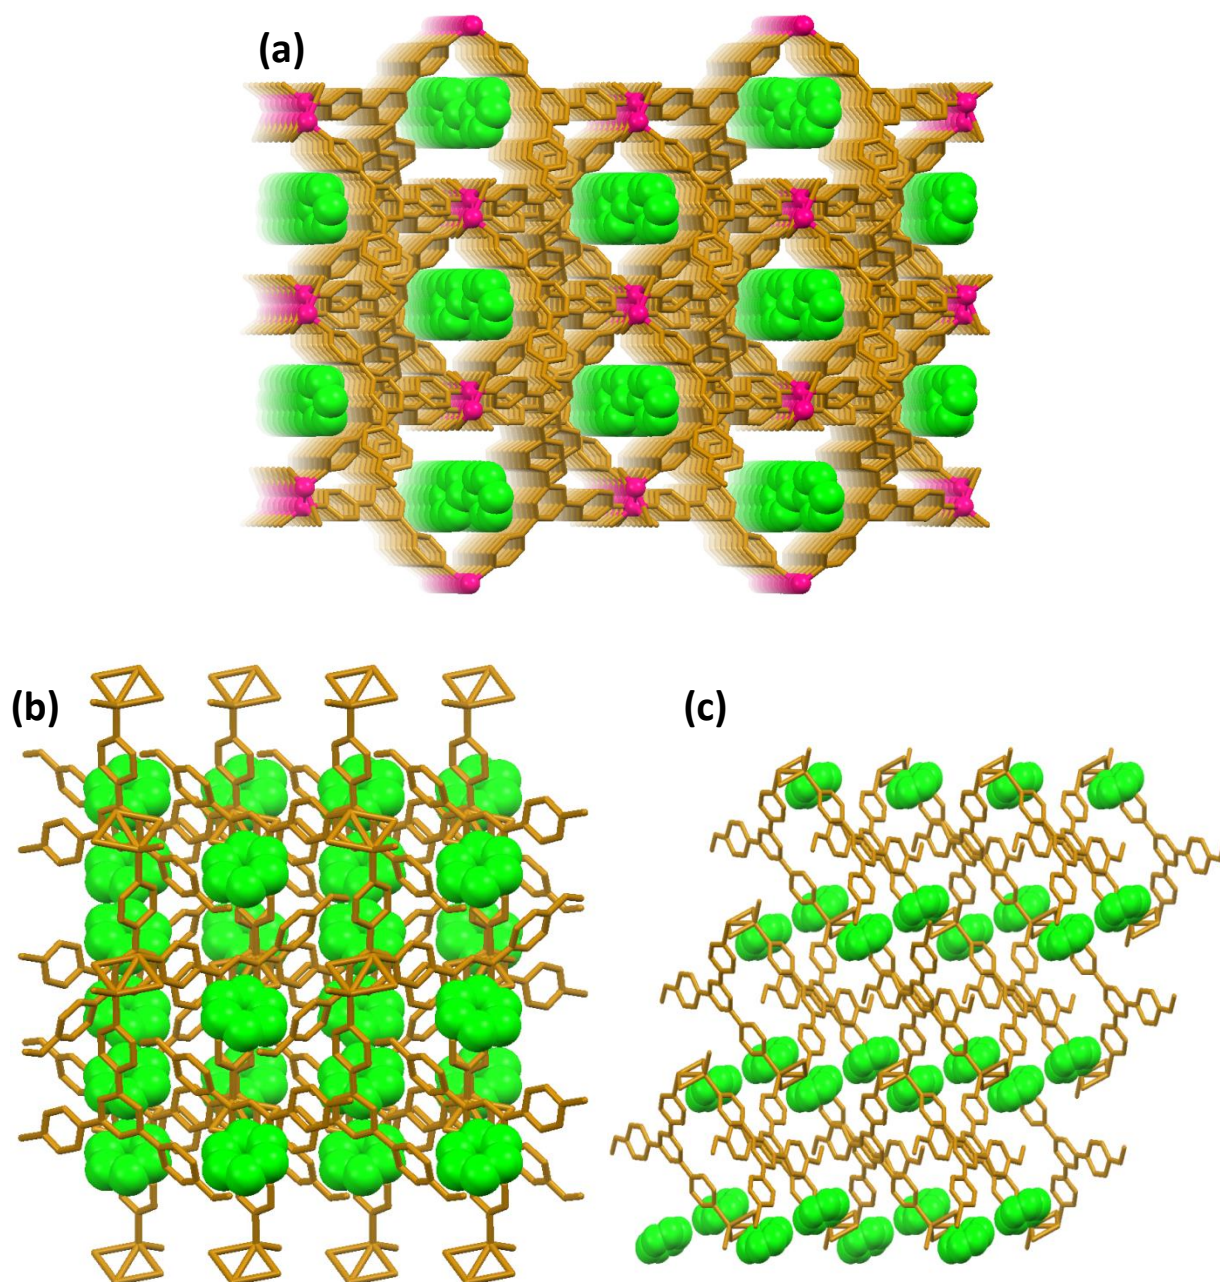

**Figure S19.** Solid state packing diagram of **PhH** molecules in **PhH@Cu(I)MOF** (a) down the *c*-axis; (b)-(c) zigzag arrangement of **PhH** molecules along the *a* and *b*-axes.

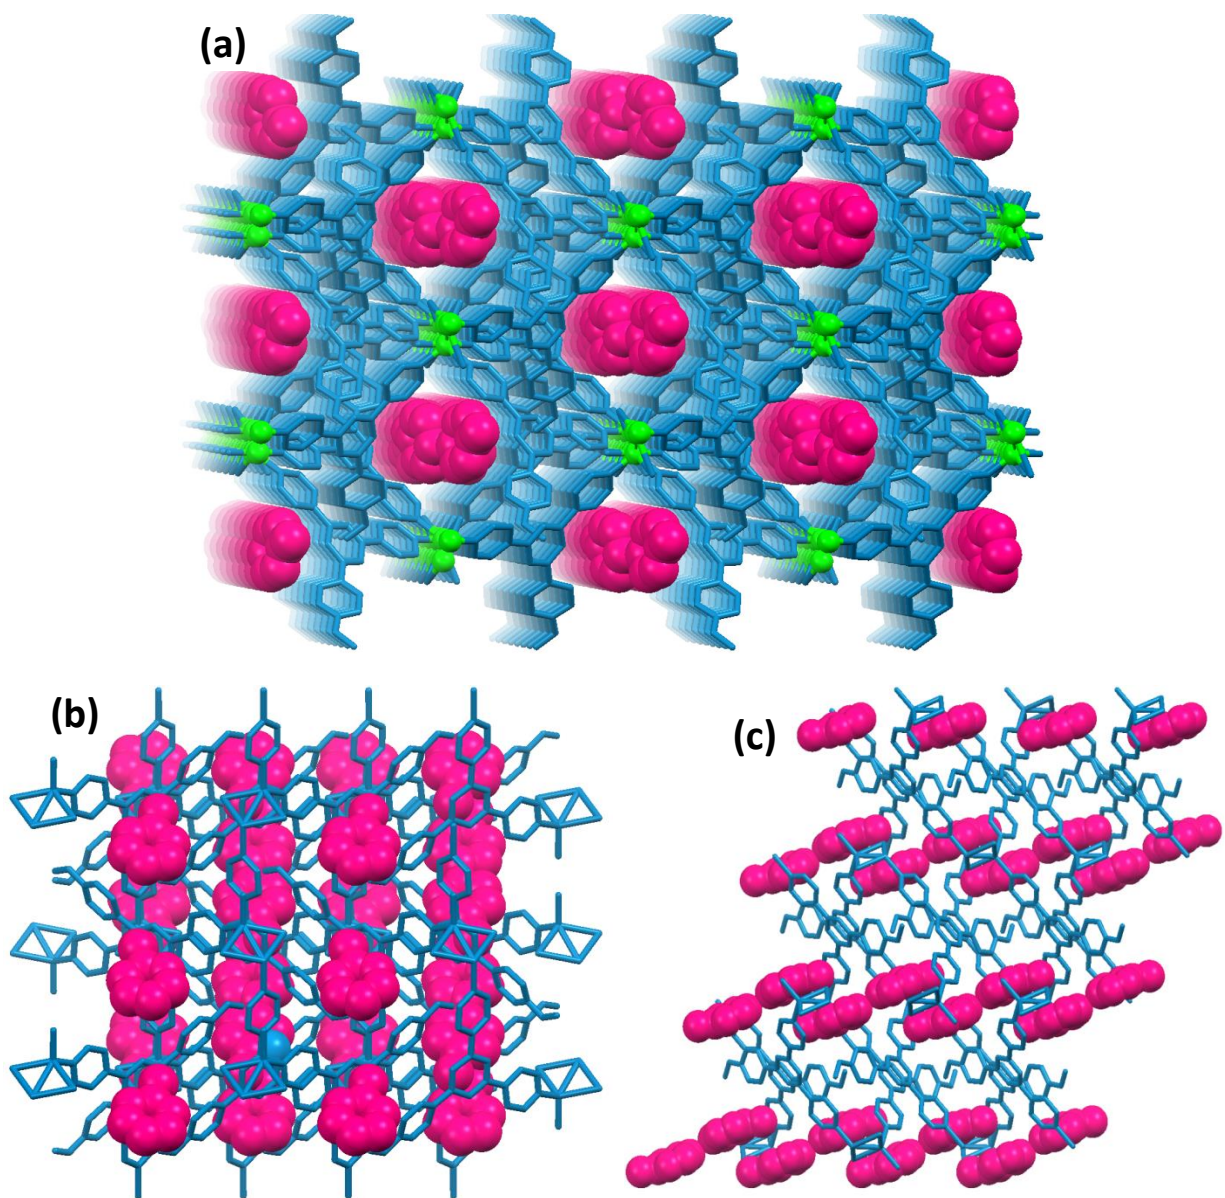

**Figure S20.** Solid state packing diagram of  $\text{PhCH}_3$  molecules in  $\text{PhCH}_3@Cu(I)MOF$  (a) down the  $c$ -axis; (b)-(c) zigzag arrangement of  $\text{PhCH}_3$  molecules along the  $a$  and  $b$ -axes.

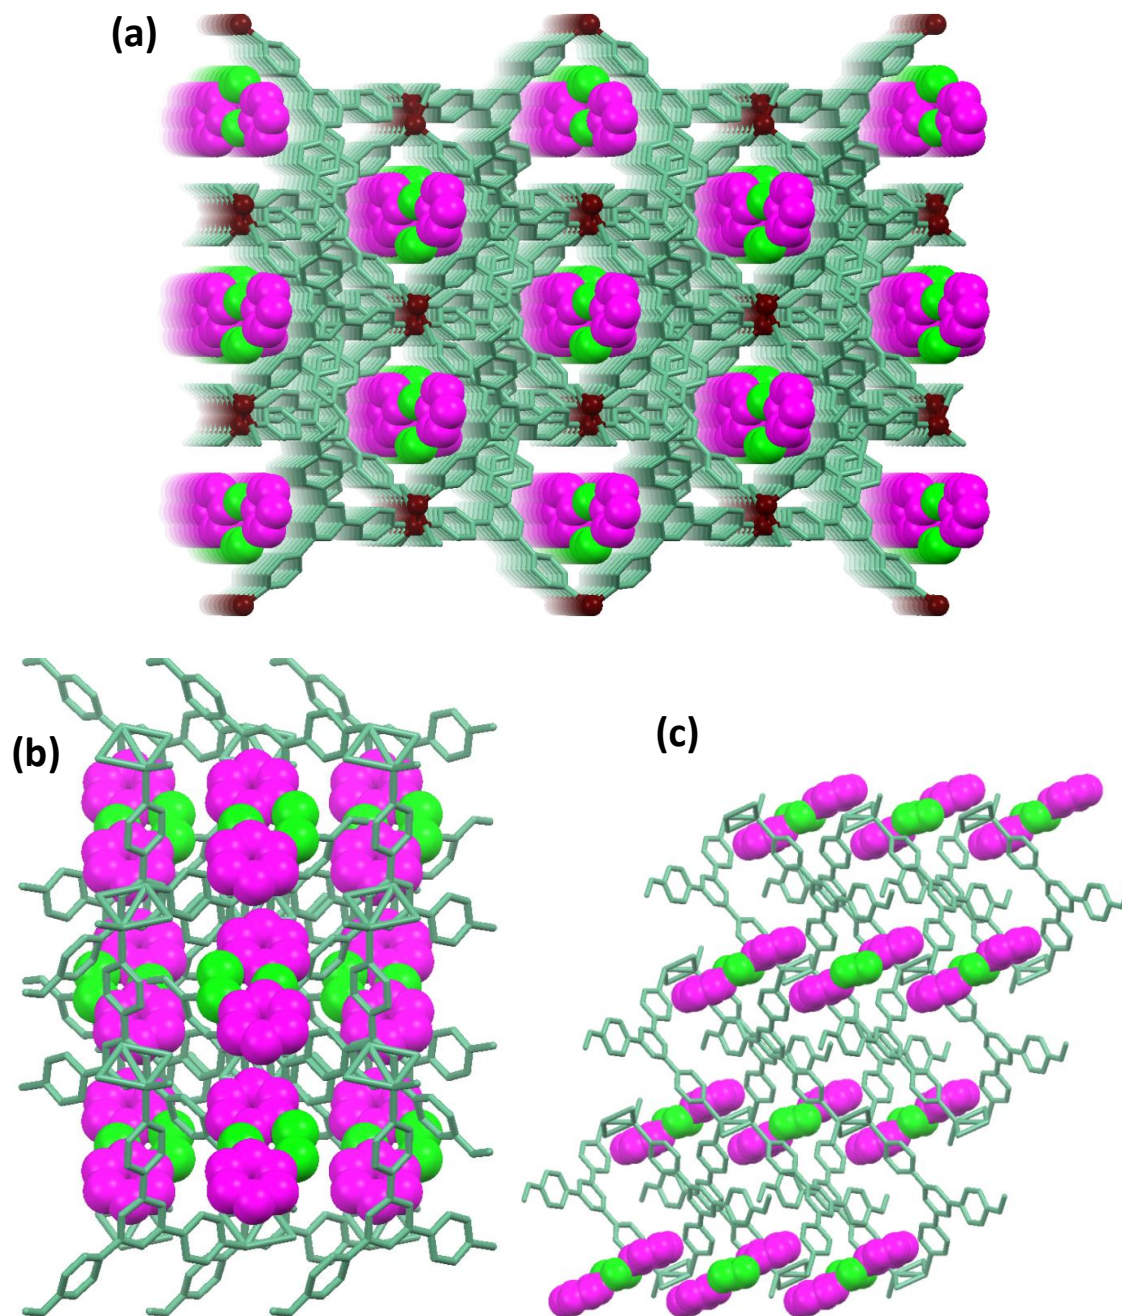

**Figure S21.** Solid state packing diagram of *o*-PhCl<sub>2</sub> molecules in *o*-PhCl<sub>2</sub>@Cu(I)MOF (a) down the *c*-axis; (b)-(c) zigzag arrangement of *o*-PhCl<sub>2</sub> molecules along the *a* and *b*-axes.

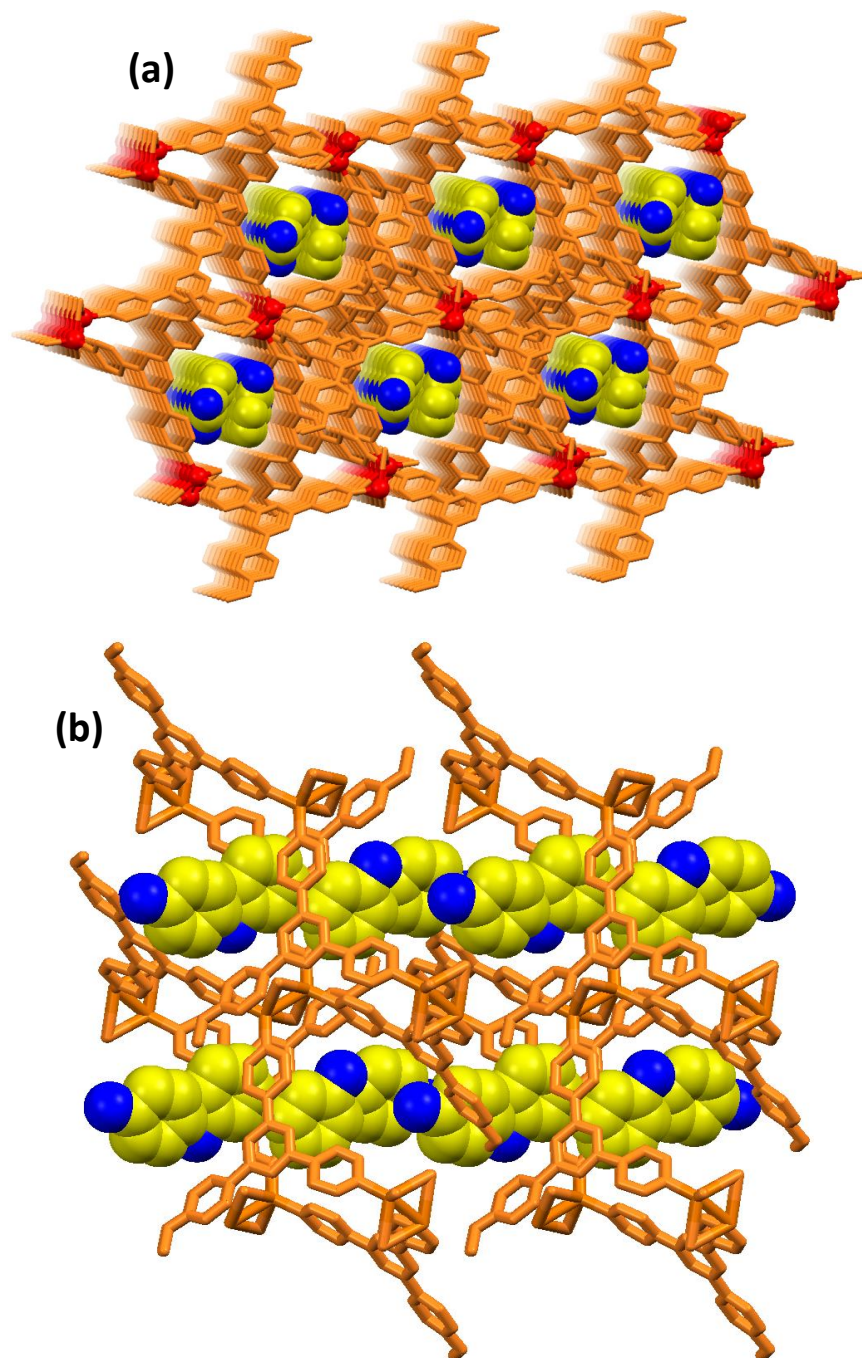

**Figure S22.** Solid state packing diagram of **PhNH<sub>2</sub>** molecules in **PhNH<sub>2</sub>@Cu(I)MOF (1w)** (a) down the *b*-axis; (b) zigzag arrangement of **PhNH<sub>2</sub>** molecules along the *c*-axis.

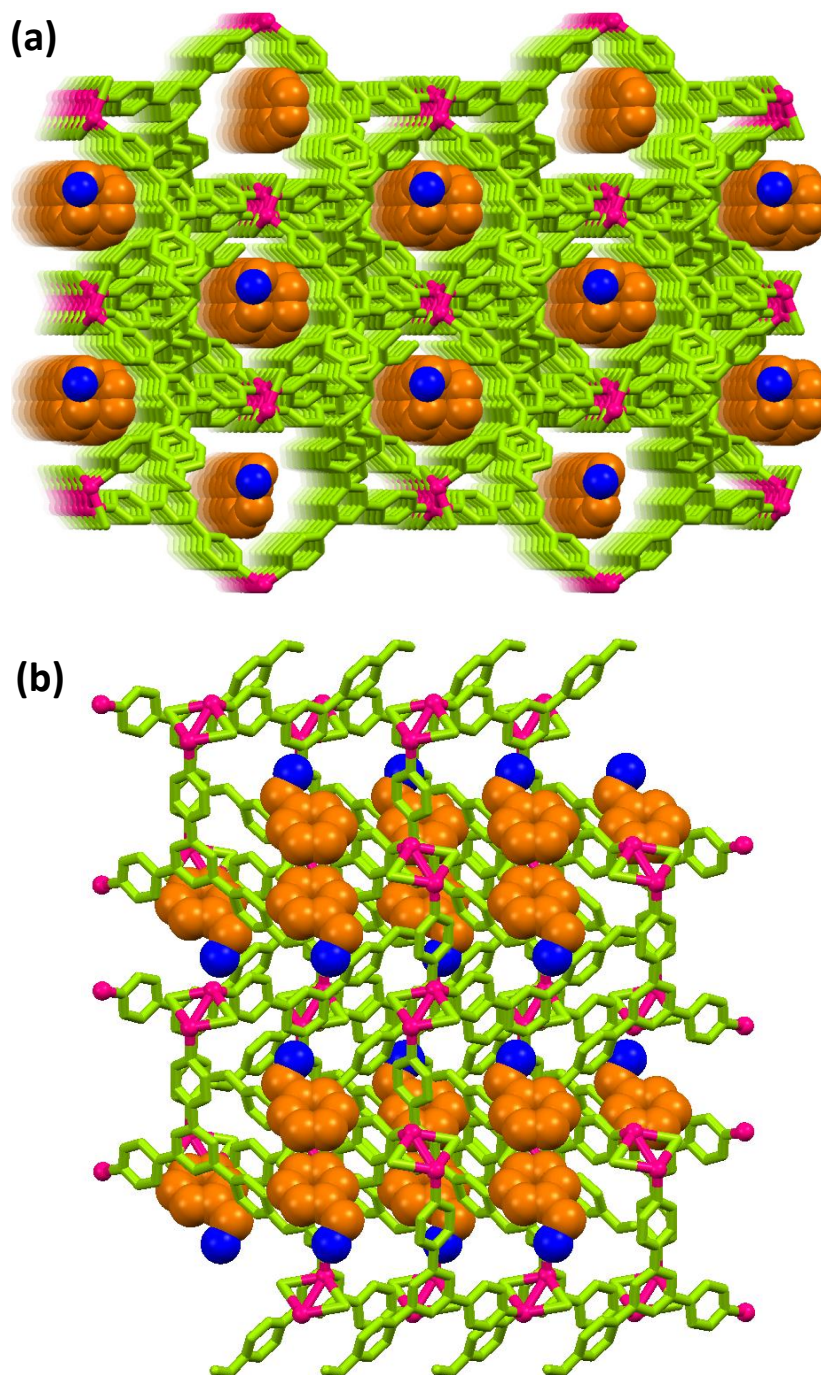

**Figure S23.** Solid state packing diagram of  $\text{PhCH}_2\text{NH}_2$  molecules in  $\text{PhCH}_2\text{NH}_2@ \text{Cu(I)MOF}$  (1x) (a) down the  $c$ -axis; (b) zigzag arrangement of  $\text{PhCH}_2\text{NH}_2$  molecules along the  $a$ -axis.

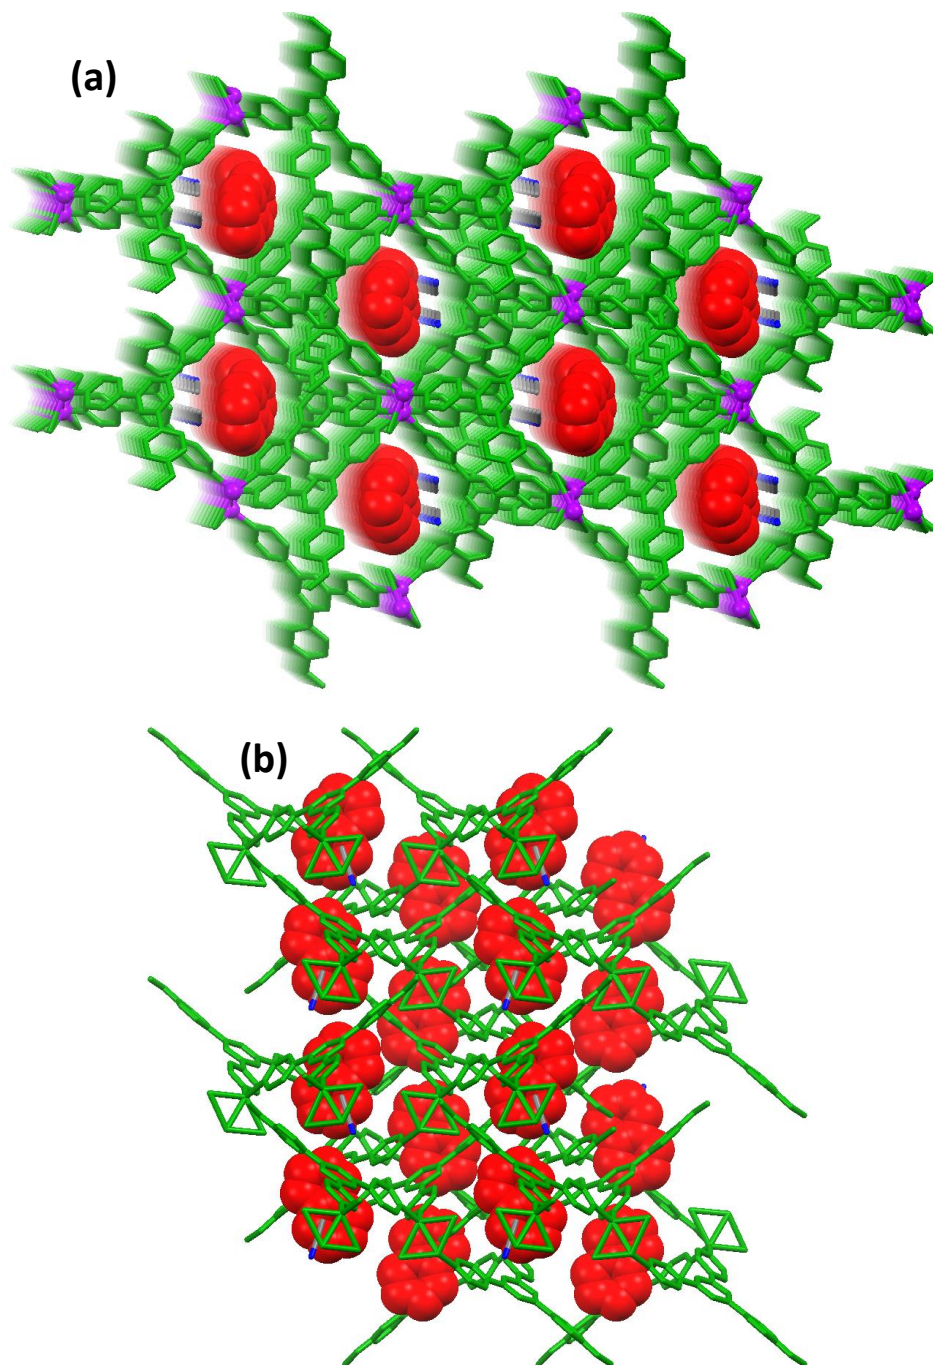

**Figure S24.** Solid state packing diagram of **naphthalene** molecules in **naphtha@Cu(I)MOF (1y)** (a) down the *c*-axis; (b) zigzag arrangement of **naphtha** molecules along the *a*-axis.

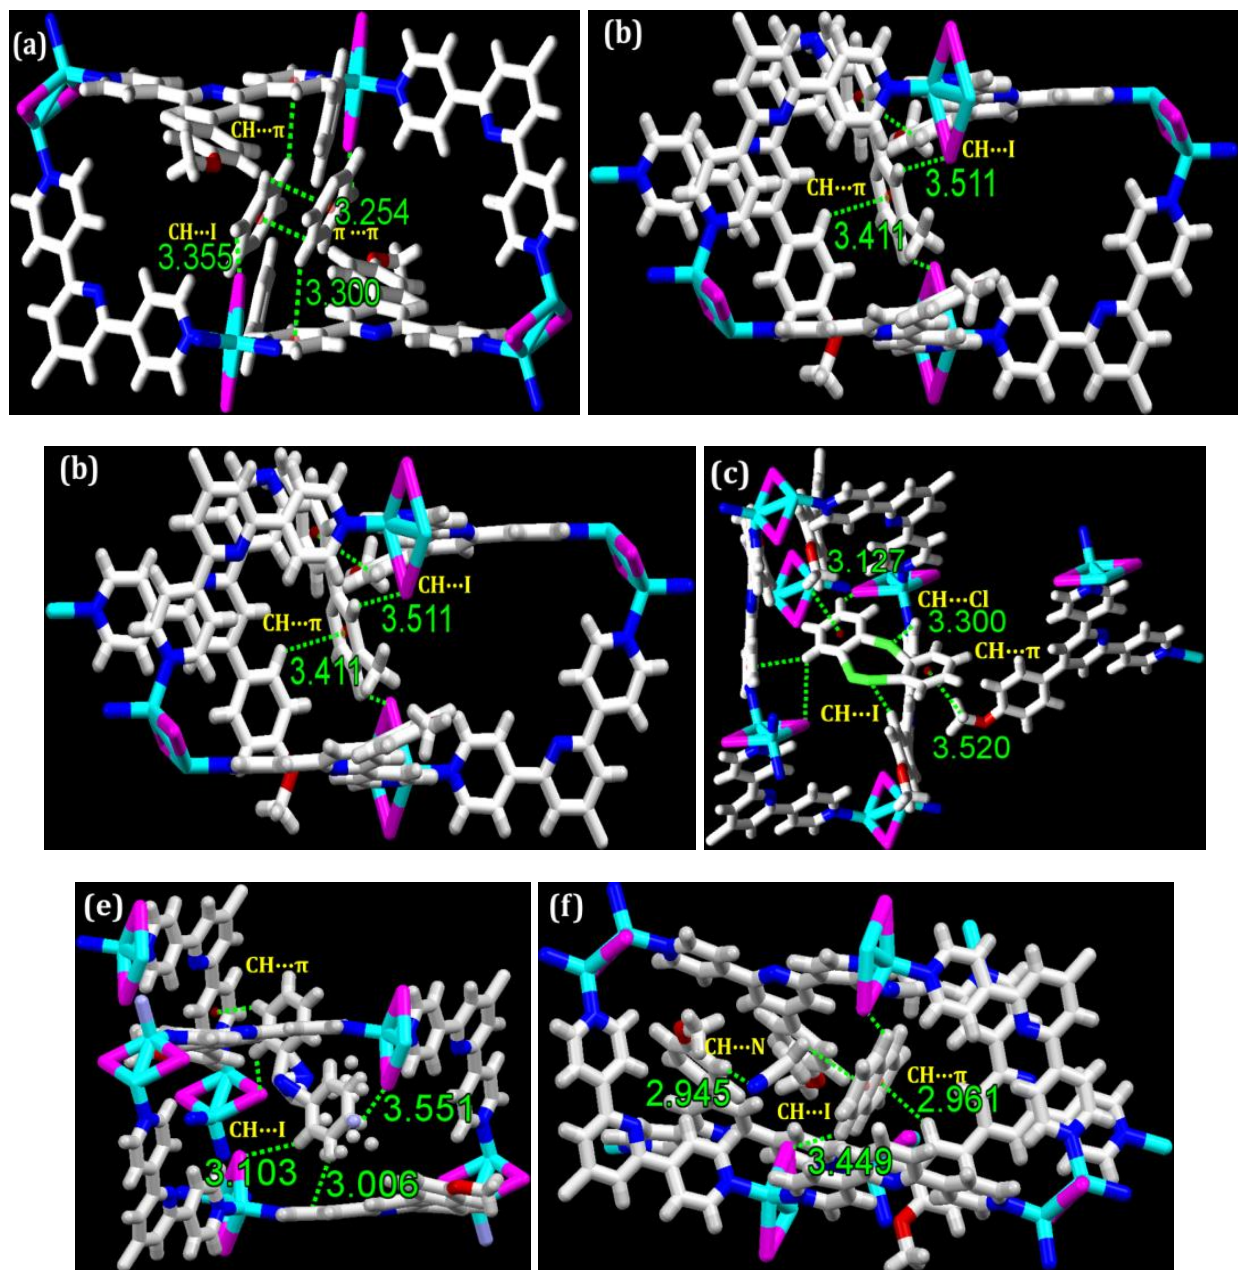

**Figure S25.** Non covalent interactions of the MOF with the incorporated guest molecules (a) Ph-H; (b) Ph-CH<sub>3</sub>; (c) *o*-PhCl<sub>2</sub>; (d) Ph-NH<sub>2</sub>; (e) Ph-CH<sub>2</sub>NH<sub>2</sub>; (f) Naphtha.

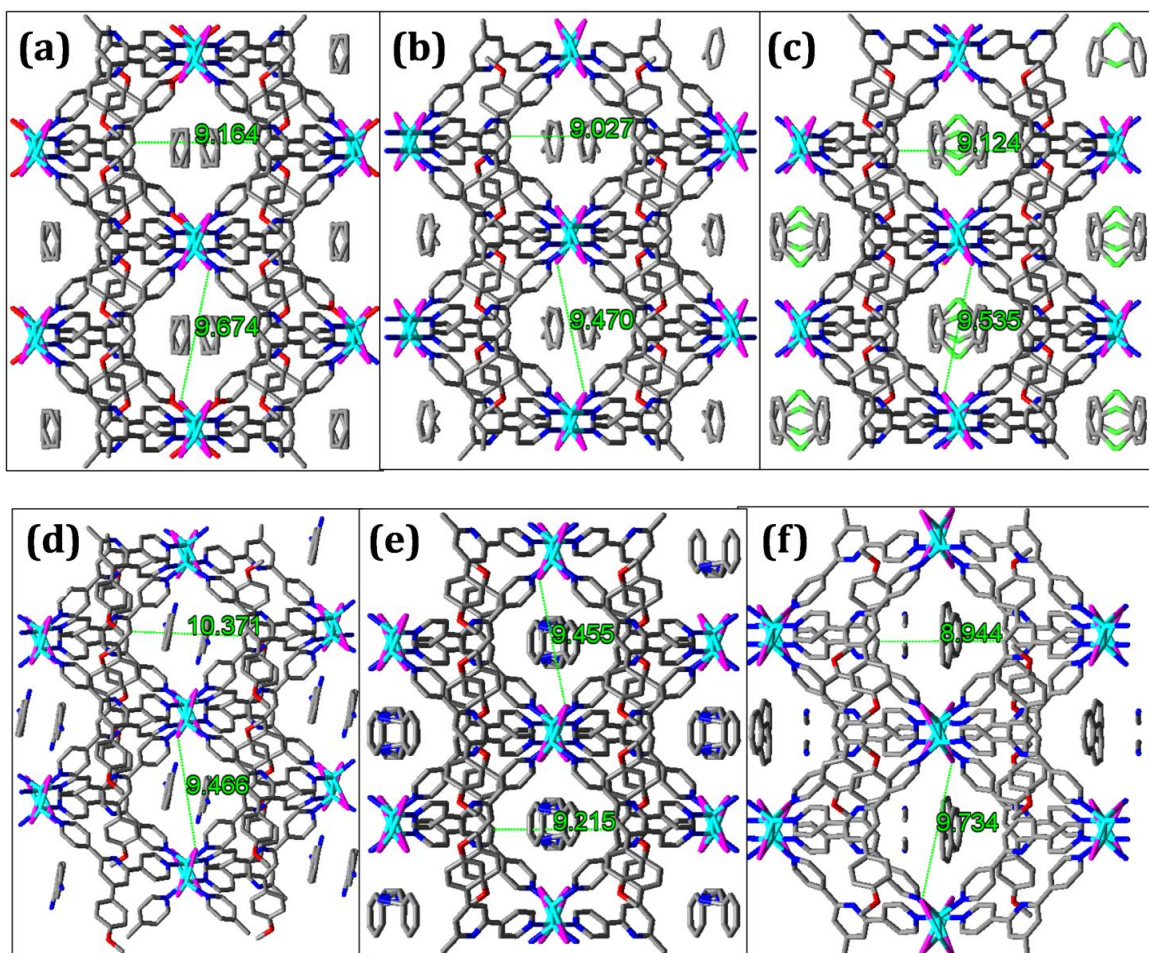

**Figure S26.** Change in hydrophilic length (I2...I2) and hydrophobic length (CH2...CH2) upon incorporation of benzene and its derivatives and naphthalene (a) benzene (b) toluene (c) o-PhCl<sub>2</sub> (d) PhNH<sub>2</sub> (e) PhCH<sub>2</sub>NH<sub>2</sub> (f) Naphtha.

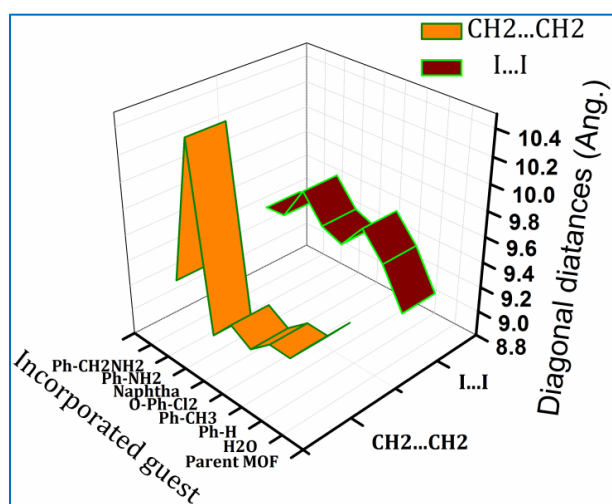

**Figure S27.** Variation of pore dimension of **1** upon inclusion of benzene and its derivatives and naphthalene.

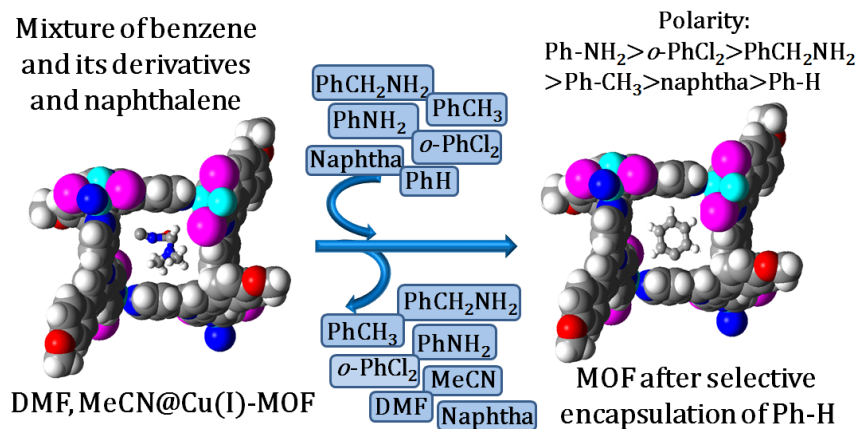

**Scheme S4.** Schematic representation of the selective incorporation of benzene among benzene and its derivatives, and naphthalene.

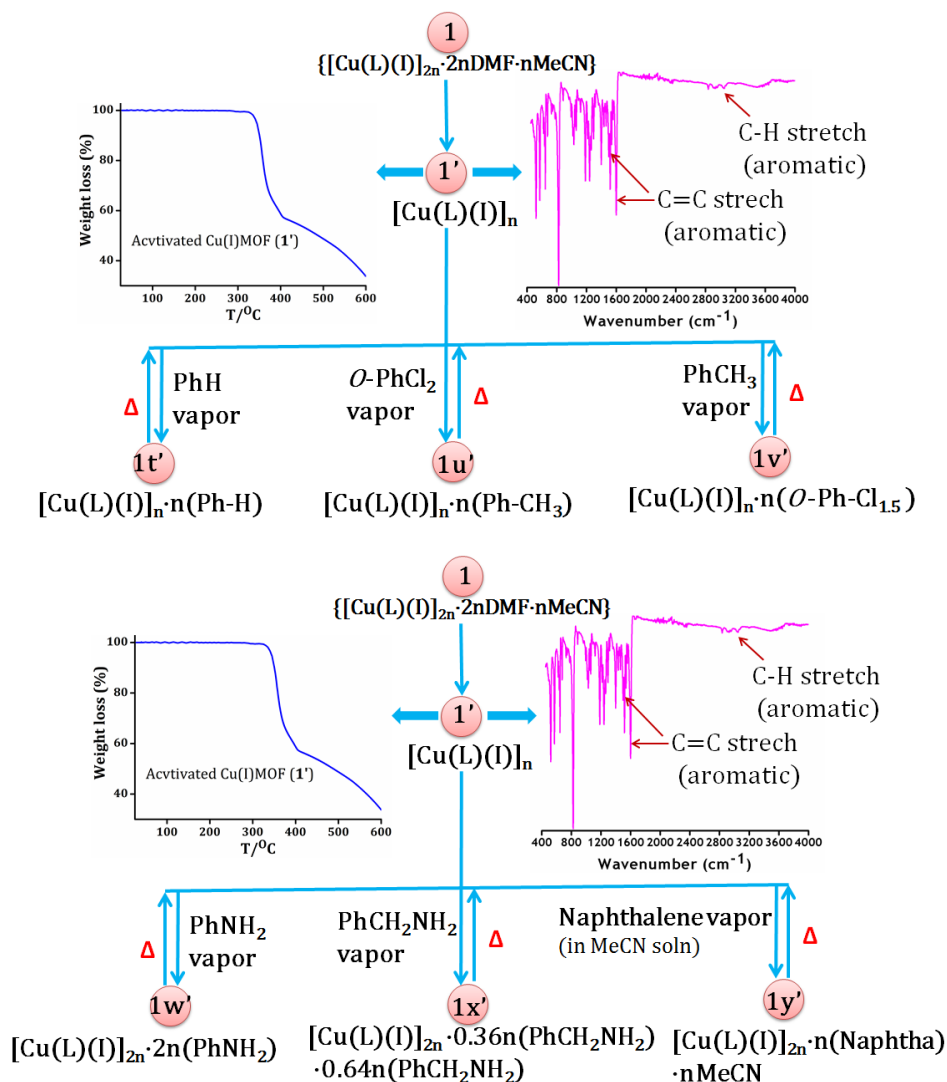

**Scheme S5.** Conversion of **1** to the desolvated framework (**1'**) and reversible adsorption and desorption of benzene and its derivatives, and naphthalene.

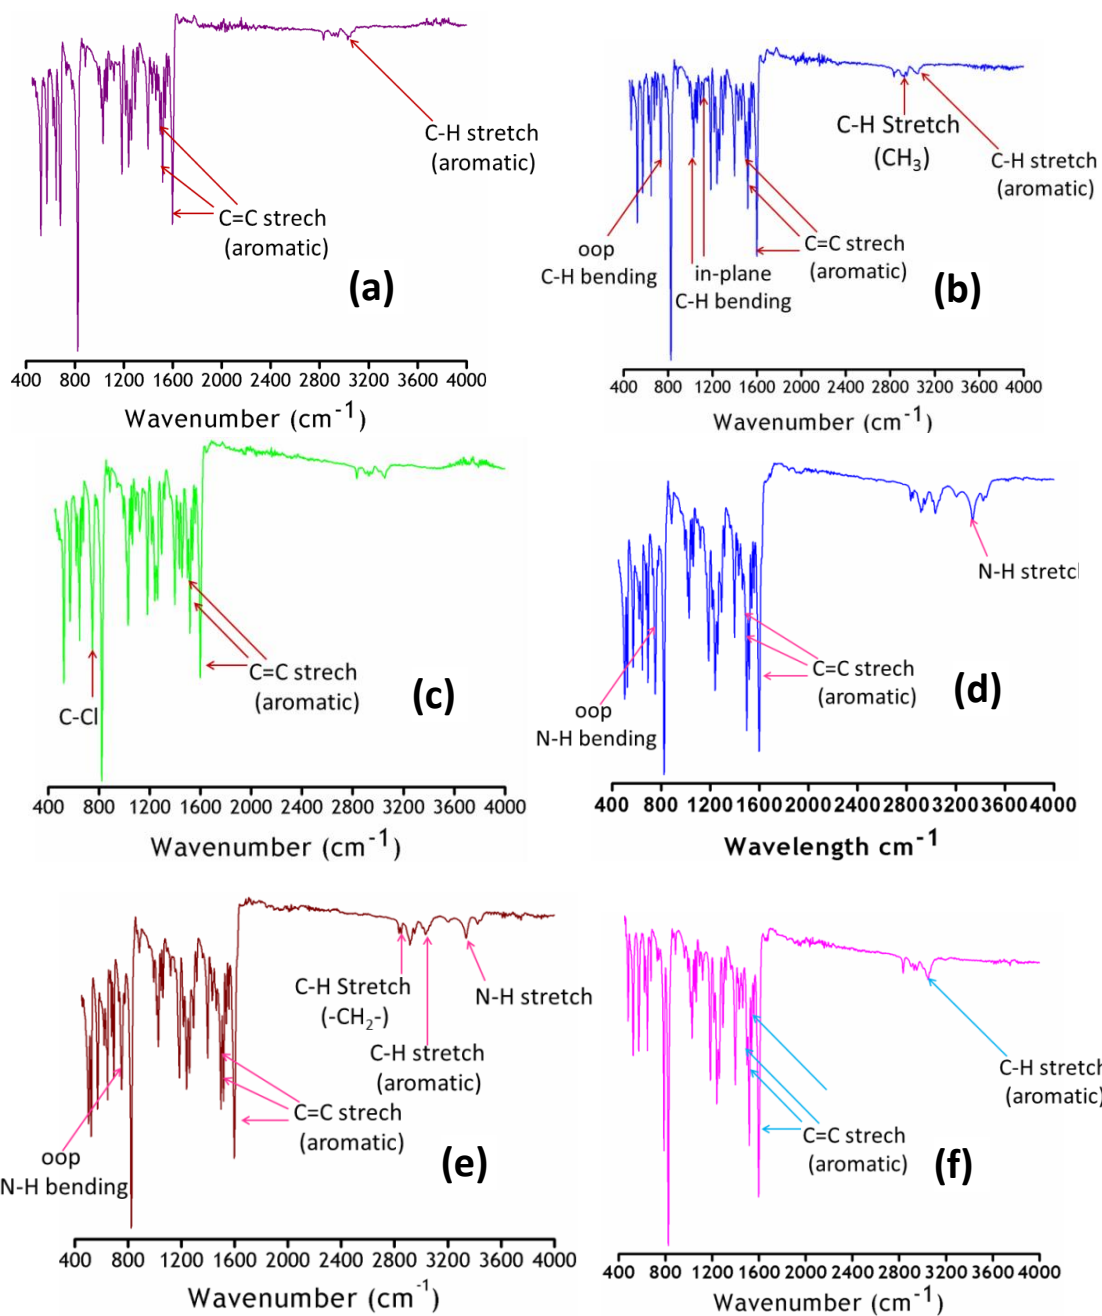

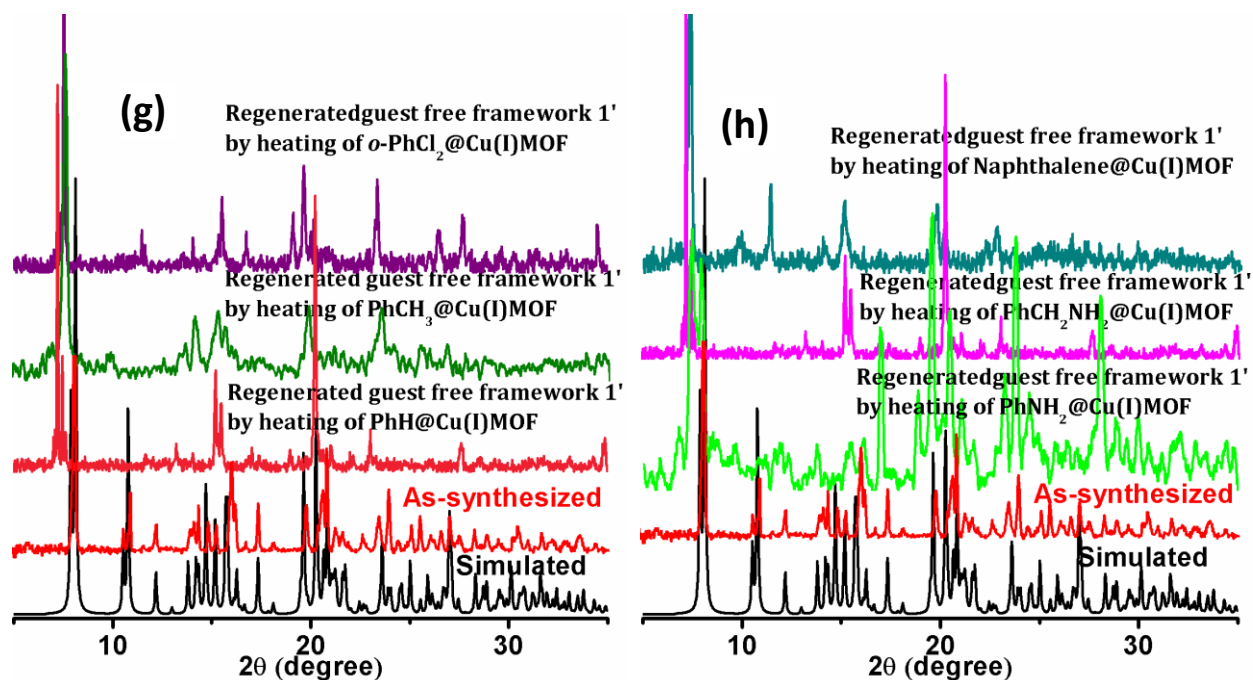

**Figure S28.** (a-f) IR spectra of **1t'**, **1u'**, **1v'**, **1w'**, **1x'** and **1y'** obtained from **1'**; (g-h): PXRD of the regenerated guest free framework of **1'** by heating the benzene and its derivative and naphthalene included Cu(I)MOF.

PXRD analysis reveals that the pattern changes during reversible inclusion and exclusion of the benzene and its derivatives and naphthalene. This can be attributed to mechanical sliding of the intertwined 2D frameworks (Figure S28g-h and Figures S29-S32) illustrating dynamic behavior of the framework of Cu(I)MOF.

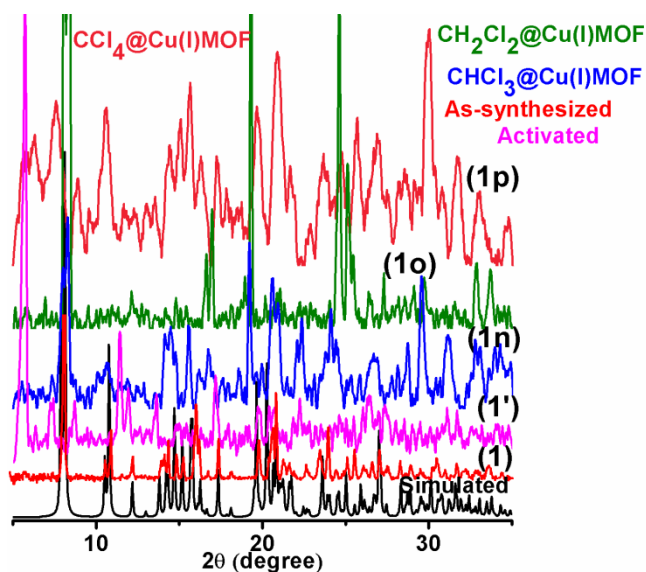

**Figure S29.** RT PXRD patterns reveal the breathing behavior of activated (**1'**) and guest exchanged complexes (**1n**, **1o** and **1p**) by gentle grinding showing phase transformation.

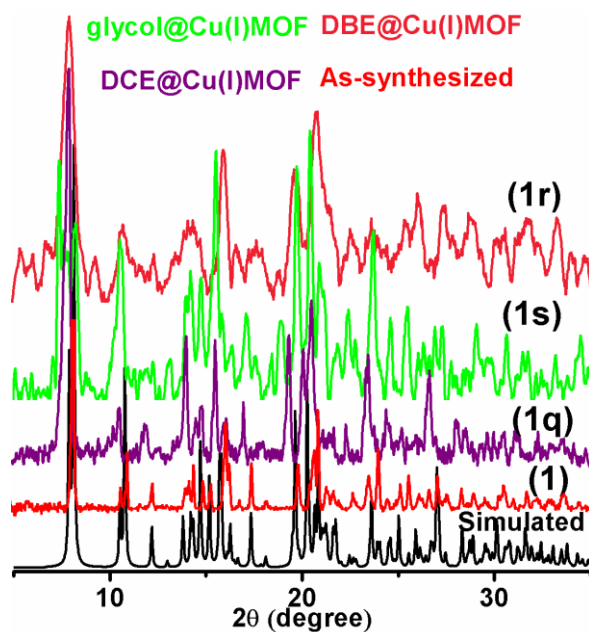

**Figure S30.** RT PXRD patterns reveal the breathing behavior of guest exchanged complexes (**1q**, **1r** and **1s**) by gentle grinding showing phase transformation.

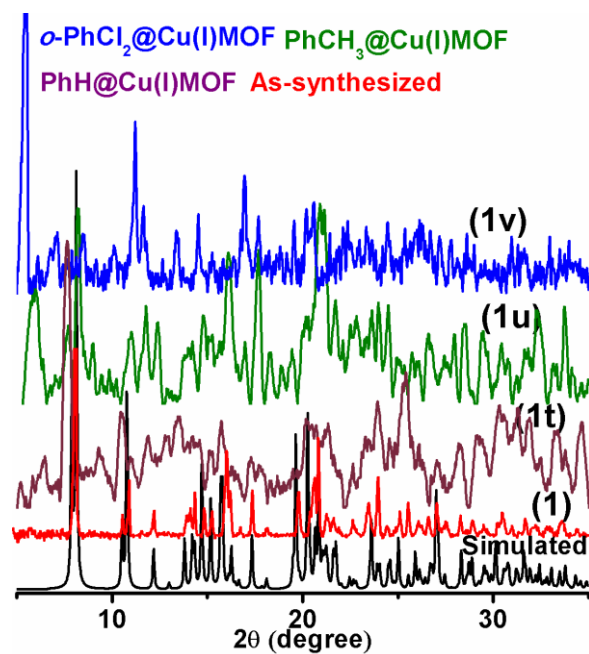

**Figure S31.** RT PXRD patterns reveal the breathing behavior of guest exchanged complexes (**1t**, **1u** and **1v**) by gentle grinding showing phase transformation.

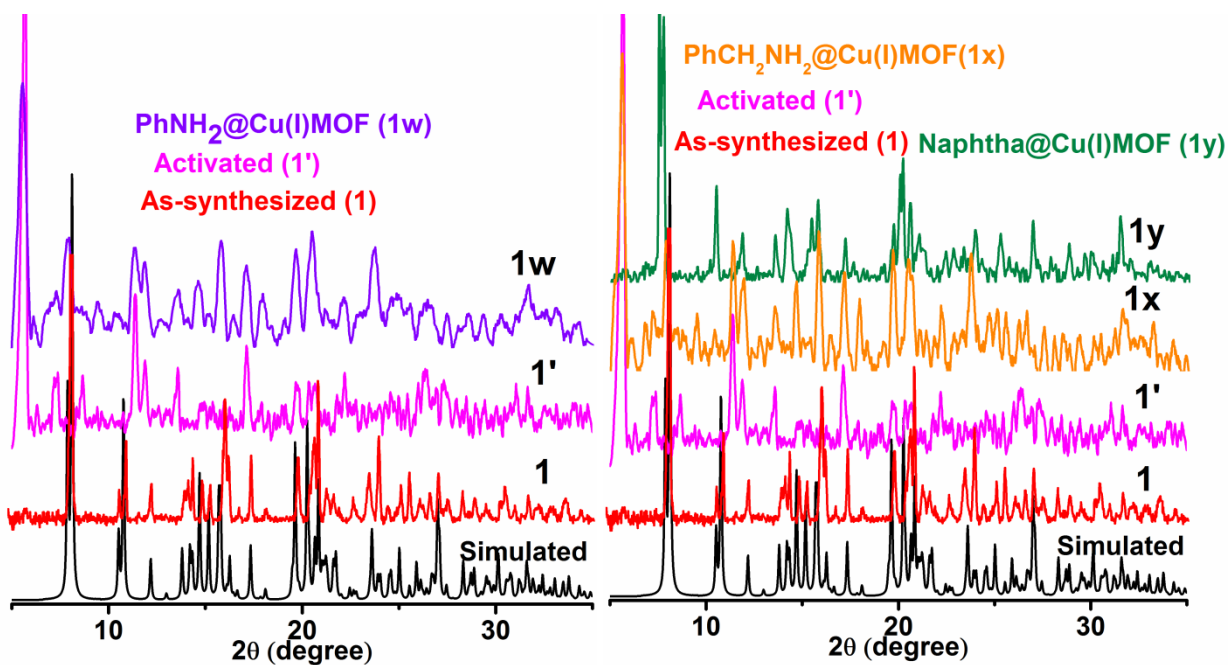

**Figure S32.** RT PXRD patterns reveal the breathing behavior of activated (1') and guest exchanged complexes (1w, 1x and 1y) by gentle grinding showing phase transformation.

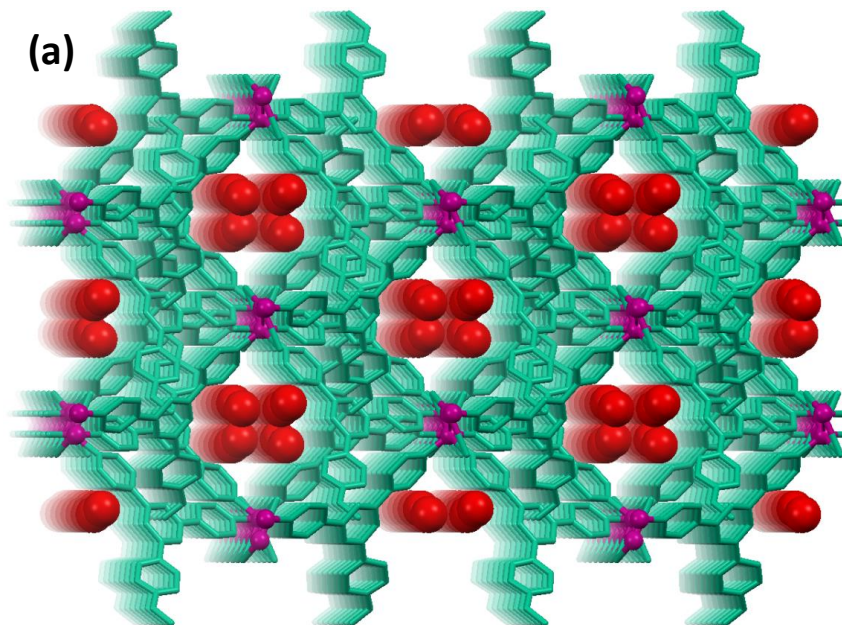

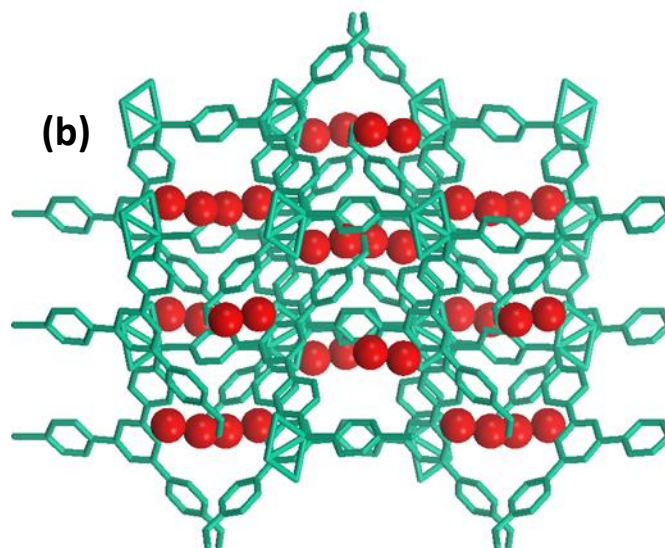

**Figure S33.** Solid state packing diagram of  $\text{H}_2\text{O}$  molecules in  $\text{H}_2\text{O}@\text{Cu(I)MOF}$  (as **intermediate** prior to guest inclusion) (a) down the  $c$ -axis; (b) zigzag arrangement of  $\text{H}_2\text{O}$  molecules along the  $a$ -axis.

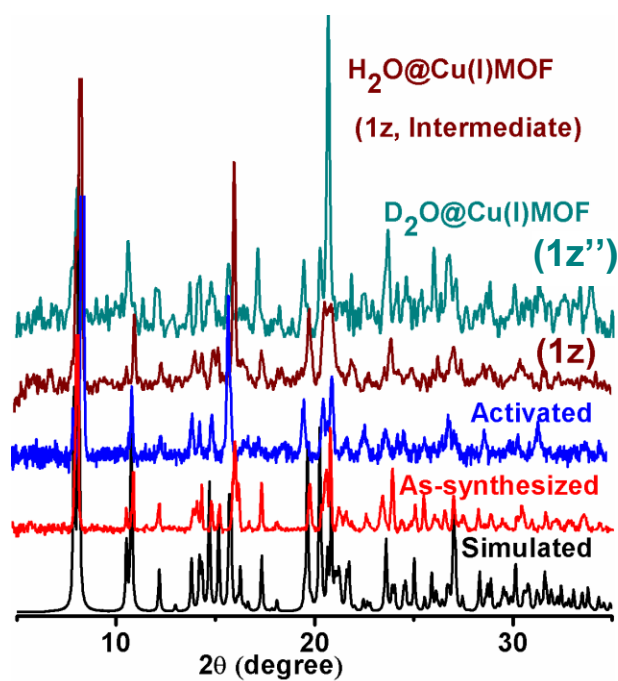

**Figure S34.** PXRD patterns of the simulated, as-synthesized (**1**), activated (**1'**), intermediate ( $\text{H}_2\text{O}@\text{Cu(I)MOF}$ ) and  $\text{D}_2\text{O}@\text{Cu(I)MOF}$  included complexes.

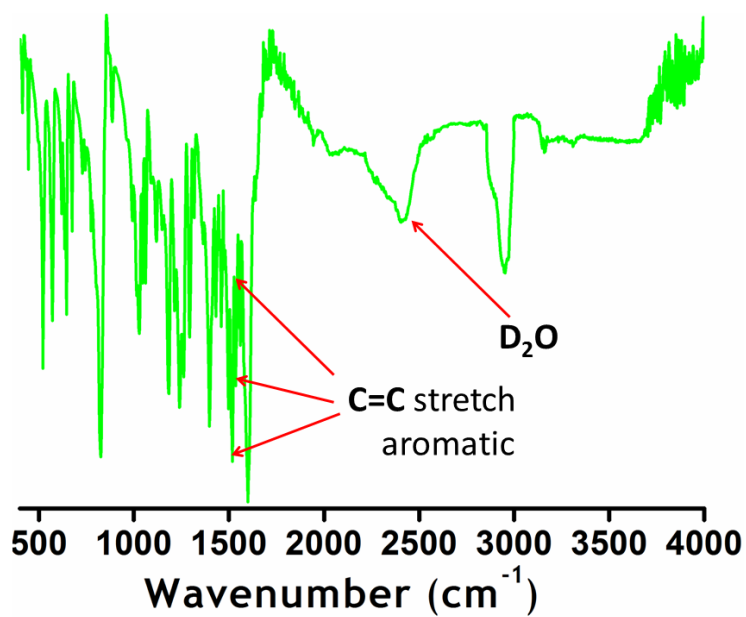

Figure S35. FTIR of  $\text{D}_2\text{O}@\text{Cu(I)MOF}$  in the presence of other guests.

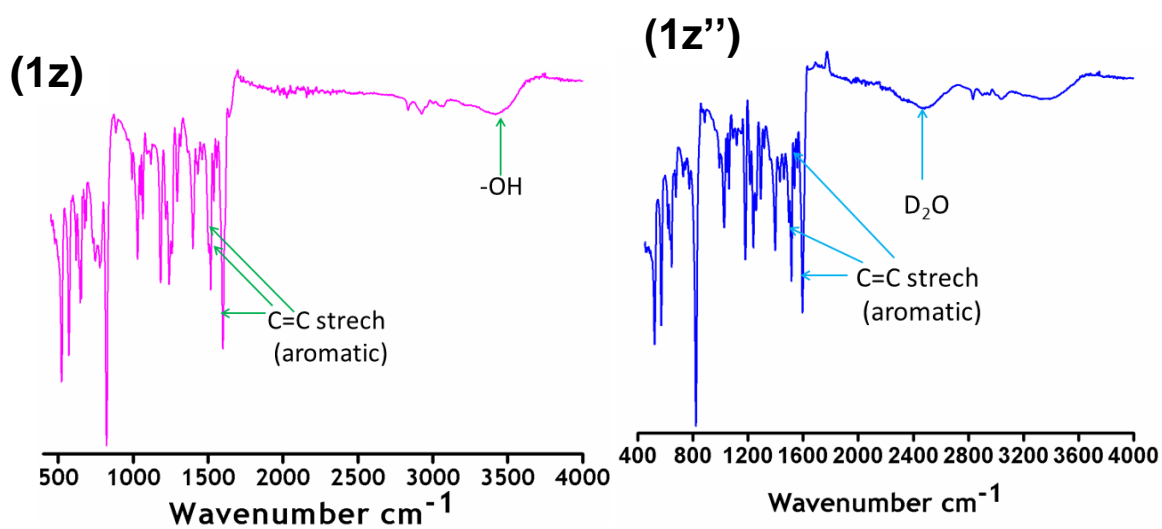

Figure S36. FTIR of  $\text{H}_2\text{O}@\text{Cu(I)MOF}$  (**1z**) and  $\text{D}_2\text{O}@\text{Cu(I)MOF}$  (**1z''**).

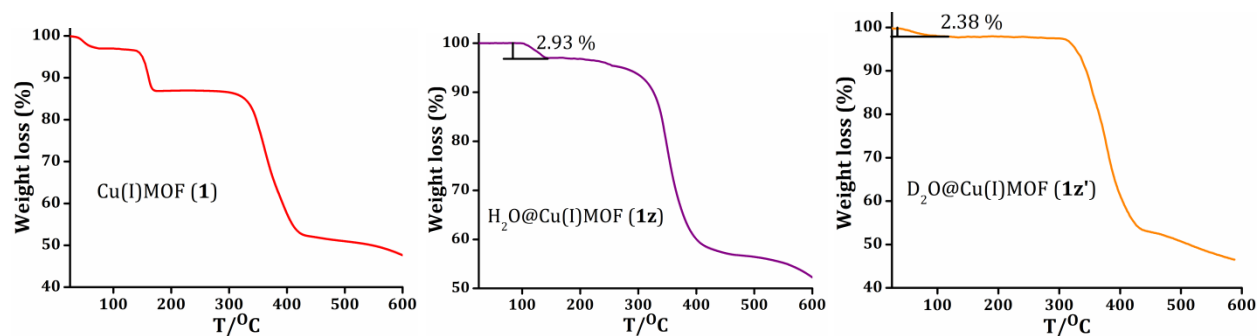

**Figure S37.** TGA thermograms of **1**, **H<sub>2</sub>O@Cu(I)MOF (1z)** and **D<sub>2</sub>O@Cu(I)MOF (1z')**.

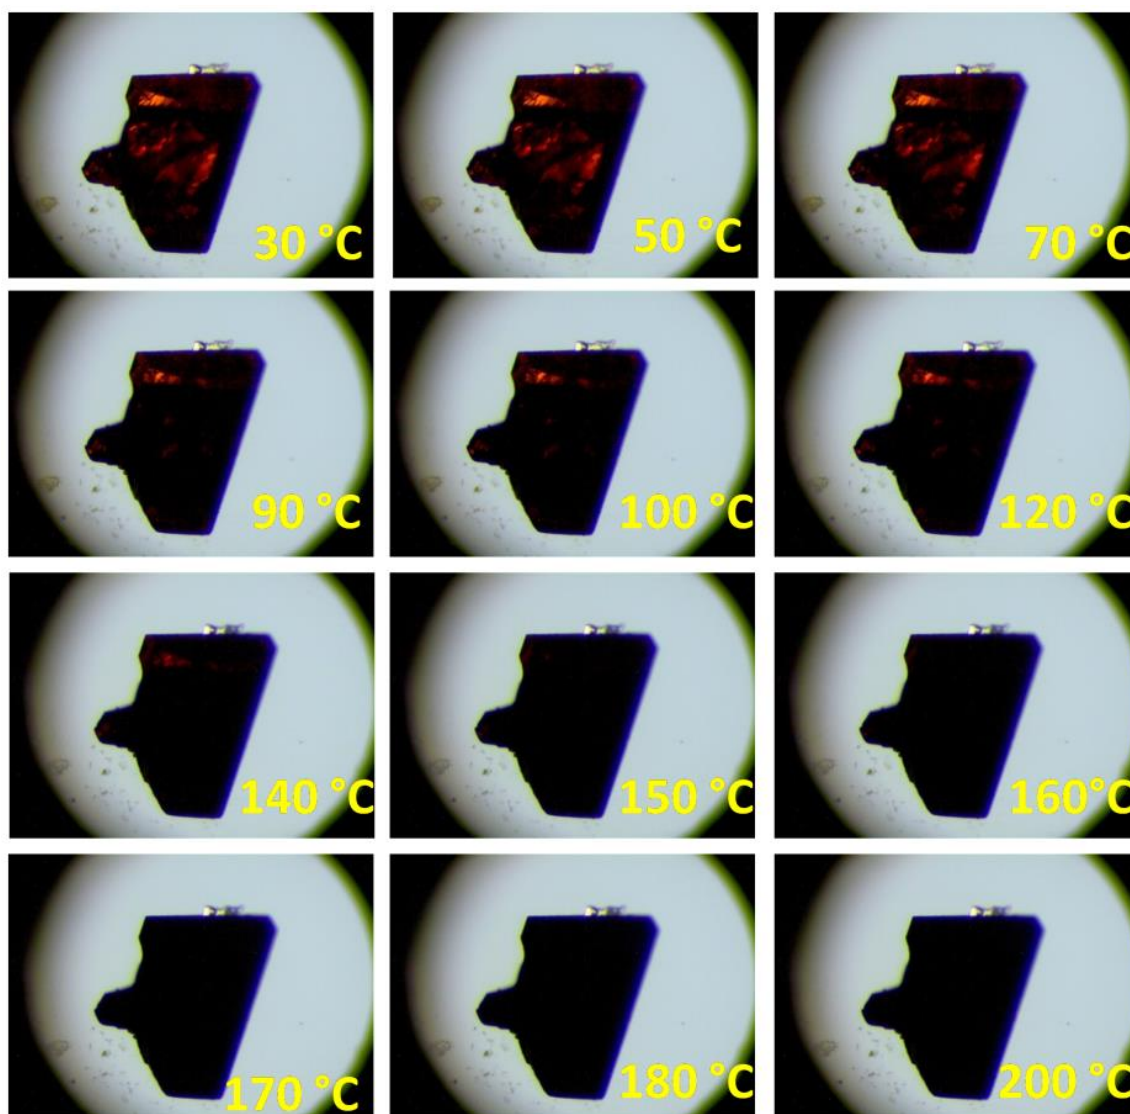

**Figure S38.** Hot stage microscopic image of the parent MOF (**1**) taken at different temperature.

**Guest responsive geometry change of parent MOF:** For the guest molecules such as  $\text{CH}_2\text{Cl}_2$ ,  $\text{CCl}_4$ , DCE, DBE, glycol, PhH,  $\text{PhCH}_3$ , *o*-PhCl<sub>2</sub>, and  $\text{PhCH}_2\text{NH}_2$  in **1o**, **1p**, **1q**, **1r**, **1s**, **1t**, **1u**, **1v**, and **1x** are crystallized in monoclinic system, Rhombohedral geometry remains the same as found in the parent MOF (**1**) and the intermediate (**1z**). But, for **naphthalene** in **1y** also crystallizes in the same system with different space group no specific geometry is observed. For the guest molecule  $\text{CHCl}_3$  and  $\text{PhNH}_2$  in **1n** and **1w**, respectively, are crystallized in triclinic system, the rhombohedral geometry is changed into parallelogram. Thus, we can say that upon inclusion of the guest molecules, geometry of the parent MOF is changed which signifies its dynamic and flexible behavior (Figures S39-S41).

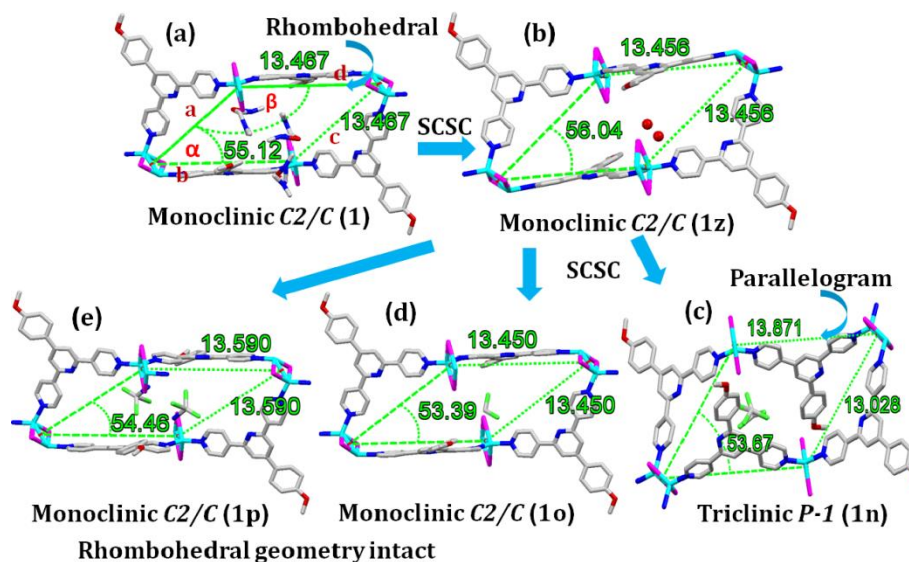

**Figure S39.** Variation of edge lengths and angles of rhombohedral geometry of the parent MOF (**1**) upon inclusion of different volatile organic solvents (a) parent MOF; (b) water in **1z**; (c)  $\text{CHCl}_3$  in **1n**; (d)  $\text{CH}_2\text{Cl}_2$  in **1o**; (e)  $\text{CCl}_4$  in **1p**.

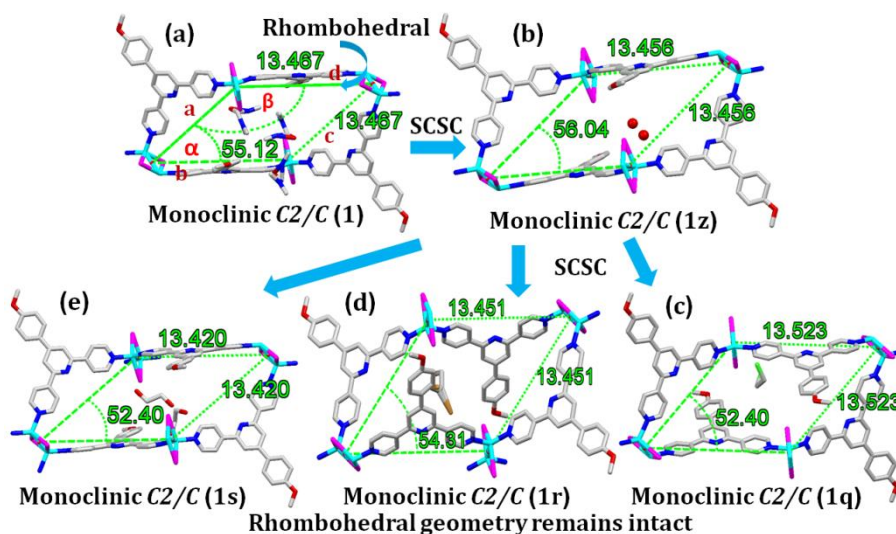

**Figure S40.** Variation of edge lengths and angles of rhombohedral geometry of the parent MOF (**1**) upon inclusion of different rotational isomers (a) parent MOF; (b) water in **1z**; (c) DCE in **1q**; (d) DBE in **1r**; (e) glycol in **1s**.

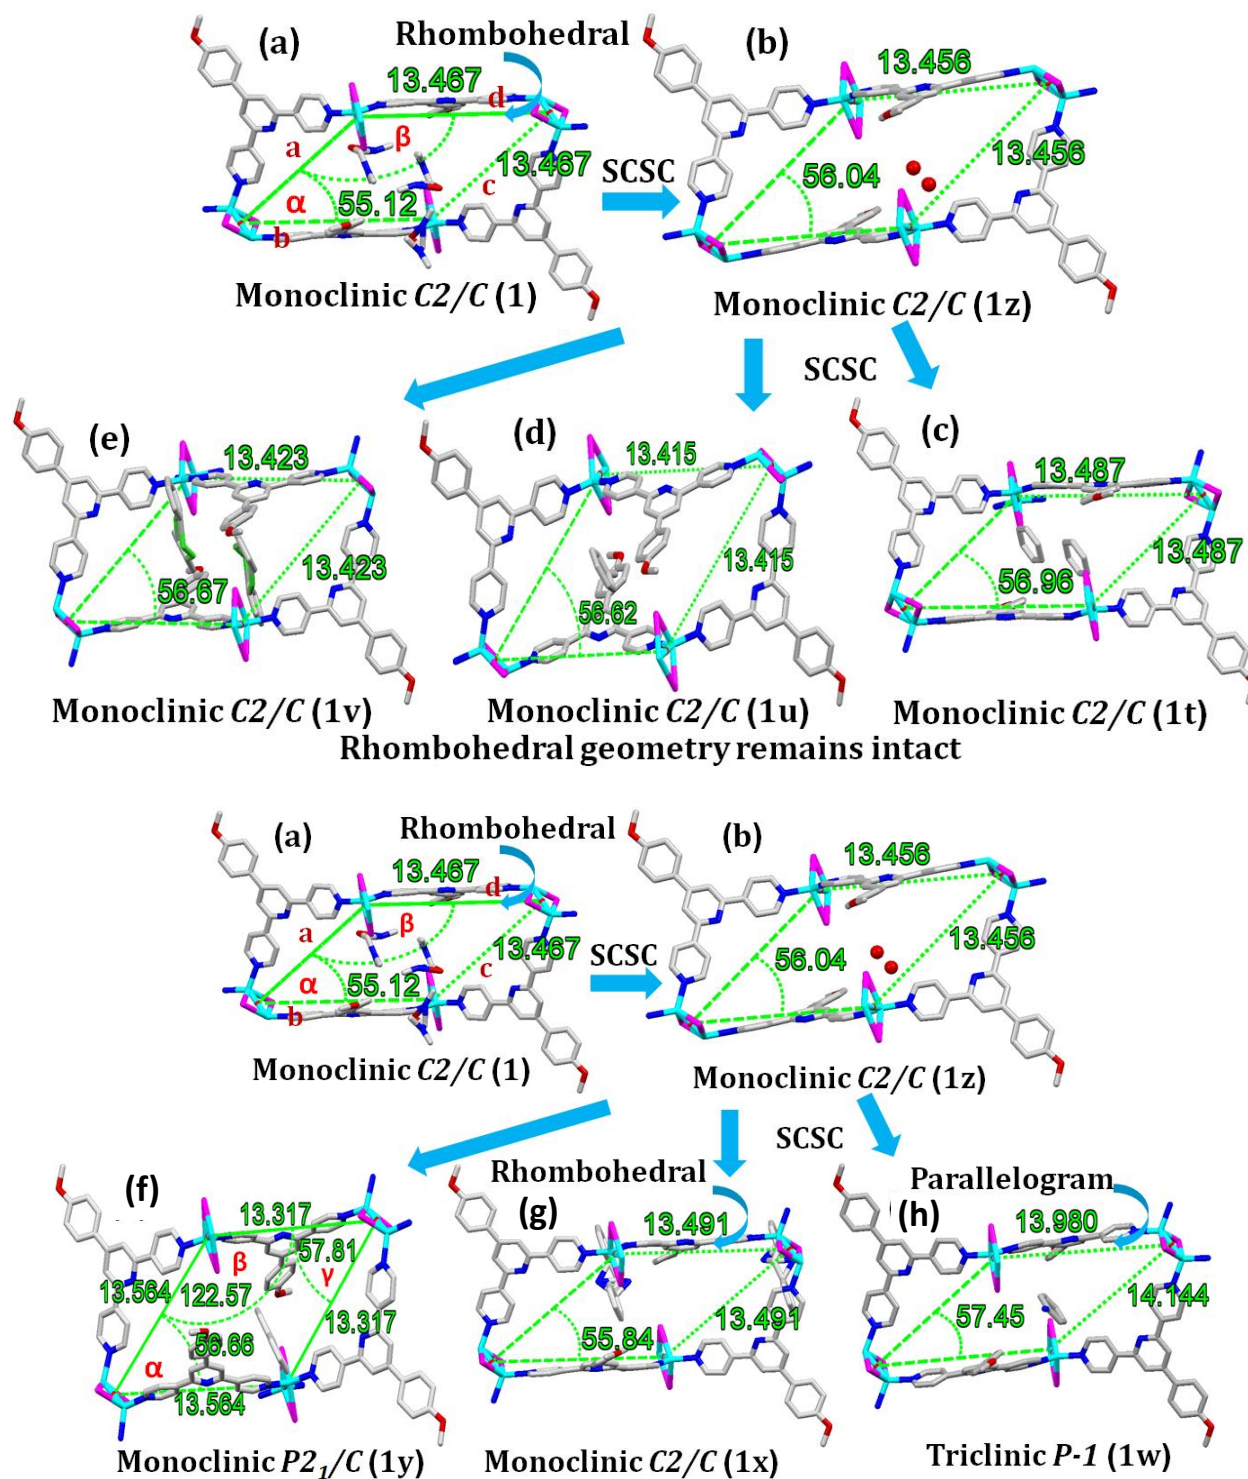

**Figure S41.** Variation of edge lengths and angles of rhombohedral geometry of the parent MOF (1) upon inclusion of benzene and its derivatives and naphthalene (a) parent MOF; (b) H<sub>2</sub>O in **1z**; (c) Benzene in **1t**; (d) Toluene in **1u**; (e) o-PhCl<sub>2</sub> in **1v**; (f) Naphthalene in **1y**; (g) PhCHNH<sub>2</sub> in **1x**; (h) PhNH<sub>2</sub> in **1w**.

**Table S6.** Variation of angles of rhombohedral geometry of [4+4] metallomacrocyclic unit of the parent MOF (1) and the guest exchanged complexes.

| Incorporated guest                | $\alpha$ | $\beta$ | $\gamma$ | Space group                   | geometry      |
|-----------------------------------|----------|---------|----------|-------------------------------|---------------|
| Parent MOF                        | 55.12    | 124.88  |          | Monoclinic C2/C               | Rhombohedral  |
| H <sub>2</sub> O                  | 55.06    | 123.96  |          | Monoclinic C2/C               | Rhombohedral  |
| CHCl <sub>3</sub>                 | 53.67    | 126.33  |          | Triclinic P-1                 | Parallelogram |
| CH <sub>2</sub> Cl <sub>2</sub>   | 53.39    | 126.61  |          | Monoclinic C2/C               | Rhombohedral  |
| CCl <sub>4</sub>                  | 54.46    | 125.54  |          | Monoclinic C2/C               | Rhombohedral  |
| DCE                               | 52.40    | 127.60  |          | Monoclinic C2/C               | Rhombohedral  |
| DBE                               | 55.31    | 125.69  |          | Monoclinic C2/C               | Rhombohedral  |
| Glycol                            | 52.40    | 127.60  |          | Monoclinic C2/C               | Rhombohedral  |
| PhH                               | 56.96    | 123.04  |          | Monoclinic C2/C               | Rhombohedral  |
| PhCH <sub>3</sub>                 | 56.62    | 123.38  |          | Monoclinic C2/C               | Rhombohedral  |
| <i>o</i> -PhCl <sub>2</sub>       | 56.67    | 123.33  |          | Monoclinic C2/C               | Rhombohedral  |
| PhNH <sub>2</sub>                 | 54.13    | 125.87  |          | Triclinic P-1                 | Parallelogram |
| PhCH <sub>2</sub> NH <sub>2</sub> | 55.84    | 124.16  |          | Monoclinic C2/C               | Rhombohedral  |
| Naphthalene                       | 56.66    | 122.57  | 57.81    | Monoclinic P2 <sub>1</sub> /C |               |

**Table S7.** Variation of edge lengths of rhombohedral geometry of [4+4] metallomacrocyclic unit of the parent MOF (1) and the guest exchanged complexes.

| Incorporated guest                | a      | b      | c      | d      | Space group                   | geometry      |
|-----------------------------------|--------|--------|--------|--------|-------------------------------|---------------|
| Parent MOF                        | 13.467 |        |        |        | Monoclinic C2/C               | Rhombohedral  |
| H <sub>2</sub> O                  | 13.456 |        |        |        | Monoclinic C2/C               | Rhombohedral  |
| CHCl <sub>3</sub>                 | 13.023 | 13.871 |        |        | Triclinic P-1                 | Parallelogram |
| CH <sub>2</sub> Cl <sub>2</sub>   | 13.450 |        |        |        | Monoclinic C2/C               | Rhombohedral  |
| CCl <sub>4</sub>                  | 13.590 |        |        |        | Monoclinic C2/C               | Rhombohedral  |
| DCE                               | 13.523 |        |        |        | Monoclinic C2/C               | Rhombohedral  |
| DBE                               | 13.451 |        |        |        | Monoclinic C2/C               | Rhombohedral  |
| Glycol                            | 13.420 |        |        |        | Monoclinic C2/C               | Rhombohedral  |
| PhH                               | 13.487 |        |        |        | Monoclinic C2/C               | Rhombohedral  |
| PhCH <sub>3</sub>                 | 13.415 |        |        |        | Monoclinic C2/C               | Rhombohedral  |
| <i>o</i> -PhCl <sub>2</sub>       | 13.423 |        |        |        | Monoclinic C2/C               | Rhombohedral  |
| PhNH <sub>2</sub>                 | 13.488 | 13.980 |        |        | Triclinic P-1                 | Parallelogram |
| PhCH <sub>2</sub> NH <sub>2</sub> | 13.491 |        |        |        | Monoclinic C2/C               | Rhombohedral  |
| Naphthalene                       | 13.564 | 13.564 | 13.317 | 13.317 | Monoclinic P2 <sub>1</sub> /C |               |

**Topological analysis after inclusion of different guests in 1D nanoporous channel of the parent MOF:** Upon inclusion of different guests, there is no significant change in topology. But the pore size of the parent MOF changes showing breathing behavior according to size of the guests. We have analyzed the pore breathing by considering four  $\text{Cu}_2\text{I}_2$  units connected with four ligands as a rhombus and subsequent change has been observed in edge lengths and angles of the rhombus.

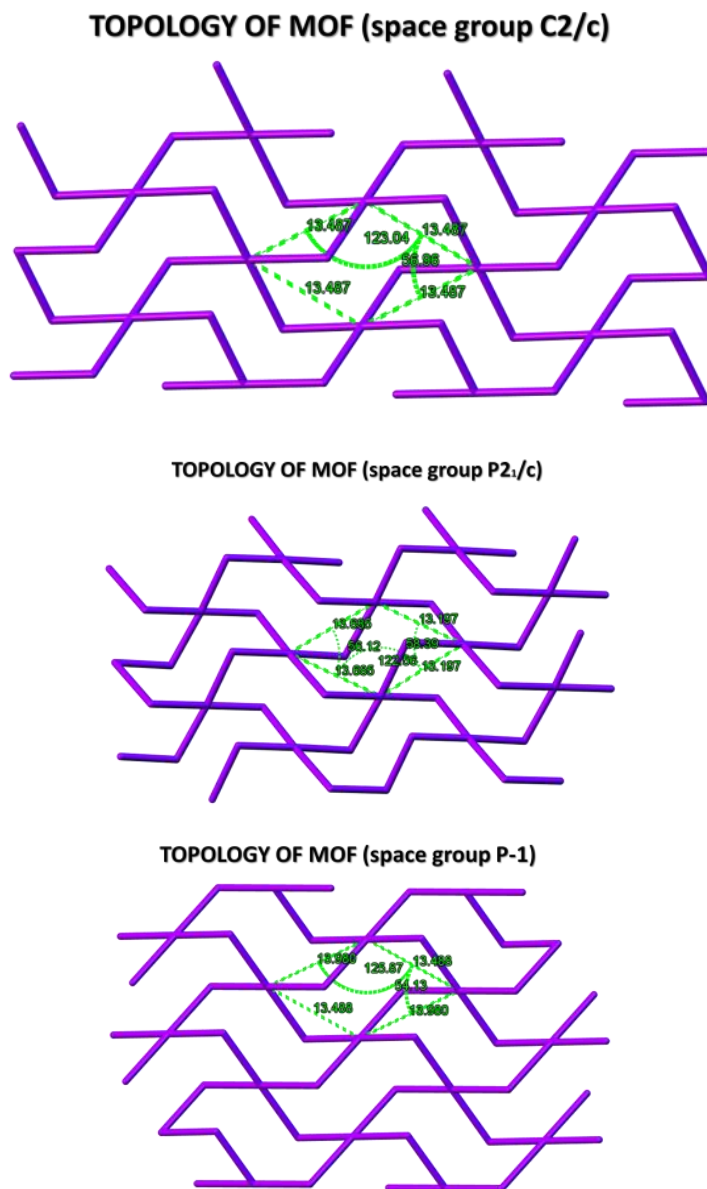

**Figure S42.** Topological analysis of the guest exchanged complexes with different space group.

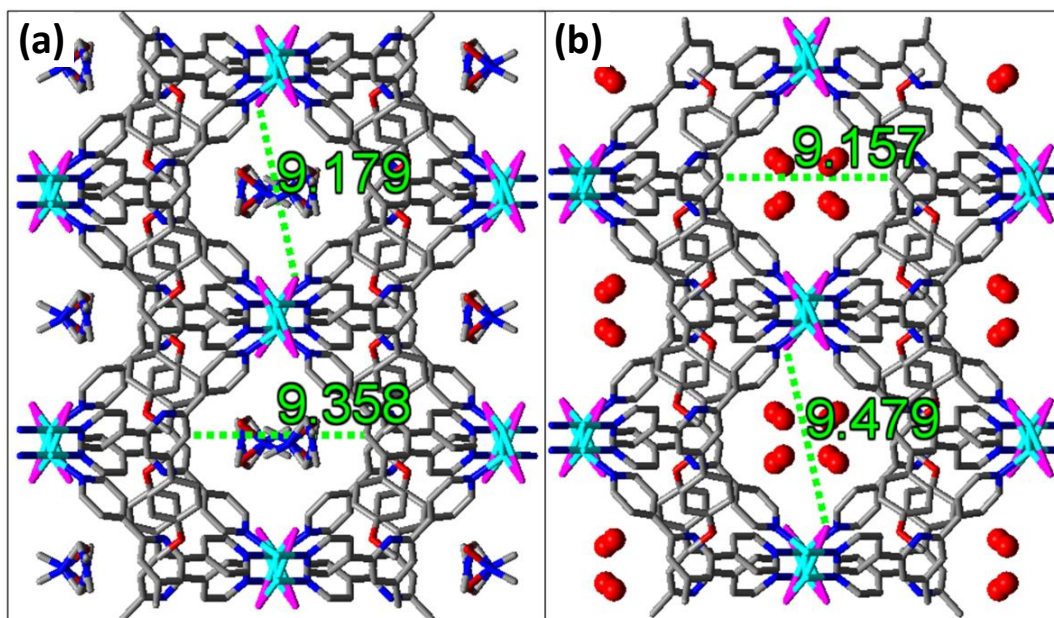

**Figure S43.** Variation of hydrophilic and hydrophobic pore dimension of the intermediate (a) Cu(I)MOF (1) (b) (H<sub>2</sub>O@Cu(I)MOF (1z)) prior to guest inclusion which is induced by vapors of the guests.

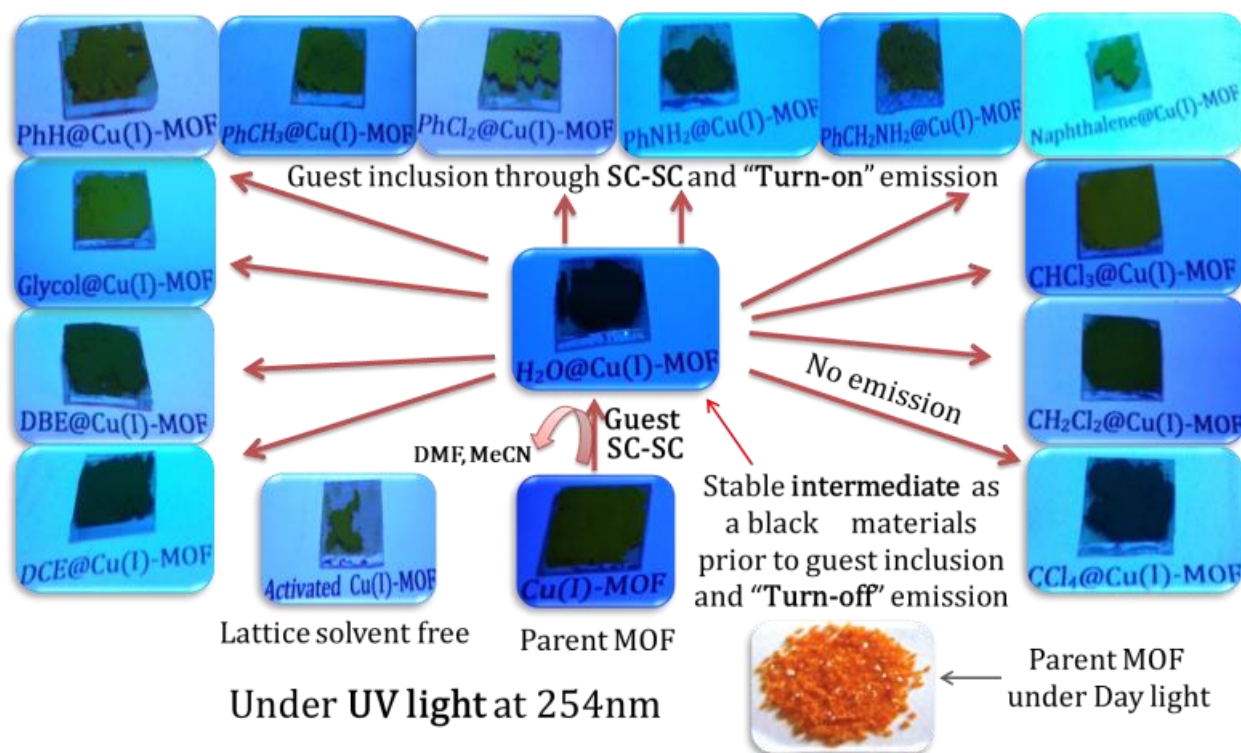

**Figure S44.** Parent MOF and its guest exchanged complexes under UV light at 254nm.

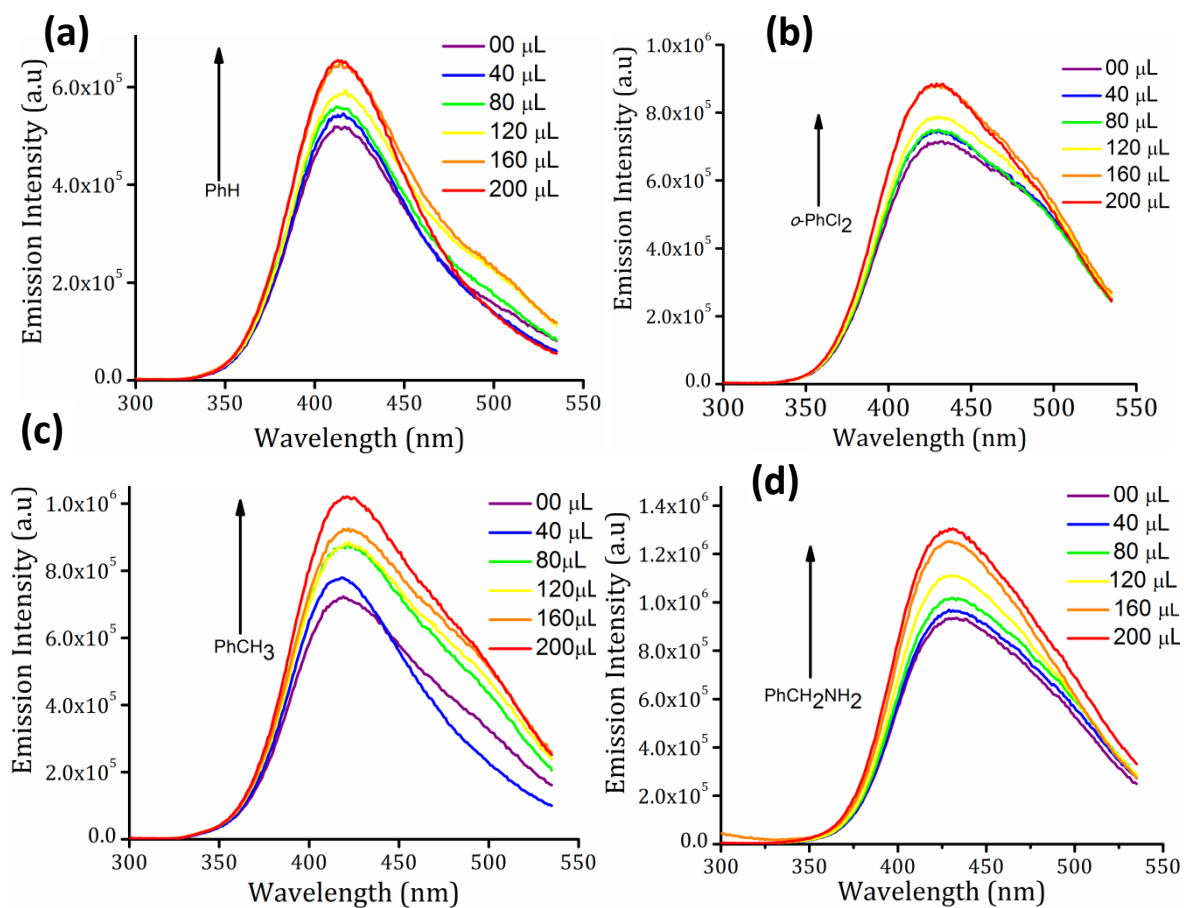

**Figure S45.** Emission spectra of **1** dispersed in dry MeCN upon incremental addition of MeCN solution of (a) PhH (b) *o*-PhCl<sub>2</sub> (c) PhCH<sub>3</sub> (d) PhCH<sub>2</sub>NH<sub>2</sub> (1mM) at room temperature.

**Table S8.** Detection limit of different analytes

| Analytes                          | Detection limit (mM) |
|-----------------------------------|----------------------|
| PhH                               | 0.0081               |
| PhCH <sub>3</sub>                 | 0.006                |
| <i>o</i> -PhCl <sub>2</sub>       | 0.0097               |
| PhNH <sub>2</sub>                 | 0.0046               |
| PhCH <sub>2</sub> NH <sub>2</sub> | 0.010                |
